# Supplementary material for: Live Fast, Die Young: Experimental Evidence of Population Extinction Risk due to Climate Change
Source: PLoS Biol. 2015 Oct 26;13(10):e1002281. doi: 10.1371/journal.pbio.1002281 (PMC4621050; doi:10.1371/journal.pbio.1002281)
Supplement: S1 Data — (XLSX) [file pbio.1002281.s001.xlsx]

## Sheet: Sheet1
Index	Year	Code	Family	BirthDate	BirthDate.c	SVL_birth	TotLength_birth	W_birth	Body_Cond_birth	Sex	Enclos_Intro	Temperature_Treatment_Intro_withIntermediate	Temperature_Treatment_Intro	Trait_Temp.c_Intro	DispersalStatus	Summer_Survival	SVL_sept	TotLength_sept	W_sept	Body_Cond_sept	SVL_Growth_summer	TotLength_growth_Summer	W_growth_summer	Annual_Survival	Winter_Survival	SVL_may	TotLength_may	W_may	Body_Cond_may	SVL_Growth_annual	TotLength_growth_annual	W_growth_annual	DateLaying_may	DateLaying.c_may	Repro_may	Clutch_may	Dens_ad_release	Dens_ad_sept	Dens_ad_may	Dens_fem_release	Dens_fem_sept	Dens_fem_may	Dens_mal_release	Dens_mal_sept	Dens_mal_may	Dens_juv_release	Dens_juv_sept	Dens_juv_may	Dens_tot_release
1	2012	0+476	174	2012-06-18	11	22	41	0.178	-0.024092	M	25	Intermediate	Warm	34	0	0								0													27	17	13	17	7	4	10	10	9	39	16	7	66
10	2012	0+513	268	2012-06-20	13	23	45	0.225	0.00562066	F	25	Intermediate	Warm	34	0	1	43	90	1.28	-0.351898	20	45	1.055	0	0												27	17	13	17	7	4	10	10	9	39	16	7	66
11	2012	0+514	268	2012-06-20	13	22	46	0.217	0.014908	F	25	Intermediate	Warm	34	0	1	41	85	1.17	-0.283581	19	39	0.953	0	0												27	17	13	17	7	4	10	10	9	39	16	7	66
12	2012	0+582	247+9	2012-06-28	21	22	46	0.198	-0.00409198	M	25	Intermediate	Warm	34	0	0								0													27	17	13	17	7	4	10	10	9	39	16	7	66
13	2012	0+583	247+9	2012-06-28	21	21	45	0.184	-0.000804609	F	25	Intermediate	Warm	34	0	1	41	74	1.15	-0.303581	20	29	0.966	0	0												27	17	13	17	7	4	10	10	9	39	16	7	66
14	2012	0+584	247+9	2012-06-28	21	22	43	0.181	-0.021092	F	25	Intermediate	Warm	34	0	0								0													27	17	13	17	7	4	10	10	9	39	16	7	66
2	2012	0+477	174	2012-06-18	11	23	45	0.196	-0.0233793	M	25	Intermediate	Warm	34	0	1	39	51	0.83	-0.445264	16	6	0.634	0	0												27	17	13	17	7	4	10	10	9	39	16	7	66
3	2012	0+478	174	2012-06-18	11	22	42	0.18	-0.022092	M	25	Intermediate	Warm	34	0	0								0													27	17	13	17	7	4	10	10	9	39	16	7	66
4	2012	0+480	174	2012-06-18	11	22	44	0.182	-0.020092	M	25	Intermediate	Warm	34	0	0								0													27	17	13	17	7	4	10	10	9	39	16	7	66
5	2012	0+481	174	2012-06-18	11	22	44	0.182	-0.020092	M	25	Intermediate	Warm	34	0	0								0													27	17	13	17	7	4	10	10	9	39	16	7	66
6	2012	0+508	268	2012-06-20	13	22	48	0.221	0.018908	M	25	Intermediate	Warm	34	0	0								0													27	17	13	17	7	4	10	10	9	39	16	7	66
7	2012	0+510	268	2012-06-20	13	24	48	0.233	-0.00366671	F	25	Intermediate	Warm	34	0	1	40	72	0.94	-0.424423	16	24	0.707	0	0												27	17	13	17	7	4	10	10	9	39	16	7	66
8	2012	0+511	268	2012-06-20	13	23	47	0.22	0.000620658	M	25	Intermediate	Warm	34	0	0								0													27	17	13	17	7	4	10	10	9	39	16	7	66
9	2012	0+512	268	2012-06-20	13	23	47	0.214	-0.00537934	M	25	Intermediate	Warm	34	0	1	37	48	0.83	-0.266947	14	1	0.616	0	0												27	17	13	17	7	4	10	10	9	39	16	7	66
23	2012	446+9	69	2012-06-16	9	23	49	0.229	0.00962066	M	25	Intermediate	Warm	34	0	0								0													27	17	13	17	7	4	10	10	9	39	16	7	66
24	2012	447+9	69	2012-06-16	9	23	47	0.208	-0.0113793	F	25	Intermediate	Warm	34	0	1	44	91	1.48	-0.241057	21	44	1.272	0	0												27	17	13	17	7	4	10	10	9	39	16	7	66
25	2012	448+9	69	2012-06-16	9	22	47	0.211	0.00890802	M	25	Intermediate	Warm	34	0	0								0													27	17	13	17	7	4	10	10	9	39	16	7	66
26	2012	451+9	69	2012-06-16	9	23	46	0.205	-0.0143793	M	25	Intermediate	Warm	34	0	0								0													27	17	13	17	7	4	10	10	9	39	16	7	66
27	2012	452+9	69	2012-06-16	9	23	51	0.236	0.0166207	M	25	Intermediate	Warm	34	0	0								0													27	17	13	17	7	4	10	10	9	39	16	7	66
15	2012	0+585	247+9	2012-06-28	21	21	44	0.188	0.00319539	M	25	Intermediate	Warm	34	0	0								0													27	17	13	17	7	4	10	10	9	39	16	7	66
16	2012	0+586	247+9	2012-06-28	21	22	45	0.196	-0.00609198	F	25	Intermediate	Warm	34	0	1	40	90	1.09	-0.274423	18	45	0.894	1	1	55	118	2.797	-0.283327	33	73	2.601	2013-07-21	201	1	4	27	17	13	17	7	4	10	10	9	39	16	7	66
17	2012	418+9	41B	2012-06-11	4	21	44	0.19	0.00519539	F	25	Intermediate	Warm	34	0	1	47	101	1.66	-0.328532	26	57	1.47	1	1	57	120	2.945	-0.382341	36	76	2.755					27	17	13	17	7	4	10	10	9	39	16	7	66
18	2012	426+9	41B	2012-06-11	4	21	43	0.159	-0.0258046	F	25	Intermediate	Warm	34	0	0								0													27	17	13	17	7	4	10	10	9	39	16	7	66
19	2012	427+9	41B	2012-06-11	4	23	47	0.205	-0.0143793	M	25	Intermediate	Warm	34	0	1	45	100	1.68	-0.130215	22	53	1.475	1	1	54	114	2.513	-0.44382	31	67	2.308					27	17	13	17	7	4	10	10	9	39	16	7	66
20	2012	428+9	41B	2012-06-11	4	22	46	0.213	0.010908	F	25	Intermediate	Warm	34	0	0								0													27	17	13	17	7	4	10	10	9	39	16	7	66
21	2012	444+9	69	2012-06-16	9	22	48	0.213	0.010908	F	25	Intermediate	Warm	34	0	0								0													27	17	13	17	7	4	10	10	9	39	16	7	66
22	2012	445+9	69	2012-06-16	9	23	48	0.231	0.0116207	M	25	Intermediate	Warm	34	0	0								0													27	17	13	17	7	4	10	10	9	39	16	7	66
38	2012	608+9	0+3001	2012-07-05	28	21	47	0.2	0.0151954	M	25	Intermediate	Warm	34	0	1	38	43	0.82	-0.366106	17	-4	0.62	0	0												27	17	13	17	7	4	10	10	9	39	16	7	66
39	2012	611+9	0+3001	2012-07-05	28	22	45	0.177	-0.025092	F	25	Intermediate	Warm	34	0	1	38	79	0.9	-0.286106	16	34	0.723	1	1	50	103	1.86	-0.602791	28	58	1.683			0		27	17	13	17	7	4	10	10	9	39	16	7	66
29	2012	535+9	148	2012-06-22	15	20	44	0.193	0.0254828	M	25	Intermediate	Warm	34	0	1	42	93	1.39	-0.15274	22	49	1.197	0	0												27	17	13	17	7	4	10	10	9	39	16	7	66
31	2012	537+9	148	2012-06-22	15	22	45	0.175	-0.027092	M	25	Intermediate	Warm	34	0	0								0													27	17	13	17	7	4	10	10	9	39	16	7	66
28	2012	534+9	148	2012-06-22	15	21	42	0.19	0.00519539	M	25	Intermediate	Warm	34	0	1	41	91	1.41	-0.0435811	20	49	1.22	1	1	48	111	2.281	0.0652236	27	69	2.091					27	17	13	17	7	4	10	10	9	39	16	7	66
32	2012	538+9	148	2012-06-22	15	22	47	0.177	-0.025092	F	25	Intermediate	Warm	34	0	1	40	75	0.96	-0.404423	18	28	0.783	1	1	53	100	2.258	-0.575313	31	53	2.081					27	17	13	17	7	4	10	10	9	39	16	7	66
34	2012	542+9	148	2012-06-22	15	21	41	0.194	0.00919539	F	25	Intermediate	Warm	34	0	1								1	1	62	133	4.543	0.598122	41	92	4.349	2013-07-04	184	1	4	27	17	13	17	7	4	10	10	9	39	16	7	66
35	2012	557+9	27	2012-06-26	19	21	43	0.195	0.0101954	M	25	Intermediate	Warm	34	0	0								0													27	17	13	17	7	4	10	10	9	39	16	7	66
36	2012	606+9	0+3001	2012-07-05	28	21	48	0.197	0.0121954	M	25	Intermediate	Warm	34	0	0								0													27	17	13	17	7	4	10	10	9	39	16	7	66
33	2012	541+9	148	2012-06-22	15	22	45	0.203	0.000908025	M	25	Intermediate	Warm	34	0	0								0													27	17	13	17	7	4	10	10	9	39	16	7	66
37	2012	607+9	0+3001	2012-07-05	28	23	47	0.196	-0.0233793	F	25	Intermediate	Warm	34	0	0								0													27	17	13	17	7	4	10	10	9	39	16	7	66
211	2013	642+9	3263+9	18-juin	3	22	46	0.224	0.021908	F	25	Warm	Warm	38	0	1	48	104	2.01	-0.0676905	26	58	1.786														27	22	17	16	13	10	11	9	7	35	17	6	62
251	2013	693+9	90	22-juin	7	23	50	0.237	0.0176207	M	25	Warm	Warm	38	0	1	54	80	2.42	-0.192641	31	30	2.183	1	1	56	111	2.95	-0.253834	33	61	2.713					27	22	17	16	13	10	11	9	7	35	17	6	62
27	2013	0+668	3212+9	19-juin	4	17	34	0.119	0.00334486	M	25	Warm	Warm	38	0	0								0													27	22	17	16	13	10	11	9	7	35	17	6	62
117	2013	0+768	561+9	29-juin	14	19	41	0.167	0.0167701	M	25	Warm	Warm	38	0	1	41	61	1.41	-0.0435811	22	20	1.243	1	1	52	105	2.9	0.190195	33	64	2.733					27	22	17	16	13	10	11	9	7	35	17	6	62
376	2013	848+9	0+615	23-juil	38	21	41	0.157	-0.0278046	M	25	Warm	Warm	38	0	1	30	61	0.59	0.117162	9	20	0.433	0	0												27	22	17	16	13	10	11	9	7	35	17	6	62
361	2013	831+9	436+9	13-juil	28	23	49	0.233	0.0136207	M	25	Warm	Warm	38	0	1	32	74	0.92	0.268845	9	25	0.687	1	1	51	119	2.81	0.223702	28	70	2.577					27	22	17	16	13	10	11	9	7	35	17	6	62
253	2013	695+9	90	22-juin	7	23	46	0.244	0.0246207	F	25	Warm	Warm	38	0	1	47	74	1.84	-0.148532	24	28	1.596	0	0												27	22	17	16	13	10	11	9	7	35	17	6	62
97	2013	0+746	115	27-juin	12	22	45	0.198	-0.00409198	F	25	Warm	Warm	38	0	0								0													27	22	17	16	13	10	11	9	7	35	17	6	62
378	2013	852+9	0+615	23-juil	38	20	42	0.162	-0.00551724	M	25	Warm	Warm	38	0	1	27	65	0.57	0.364638	7	23	0.408	1	1	48	112	2.44	0.224224	28	70	2.278					27	22	17	16	13	10	11	9	7	35	17	6	62
28	2013	0+670	3212+9	19-juin	4	20	40	0.171	0.00348276	M	25	Warm	Warm	38	0	0								0													27	22	17	16	13	10	11	9	7	35	17	6	62
254	2013	696+9	90	22-juin	7	23	46	0.224	0.00462066	F	25	Warm	Warm	38	0	0								0													27	22	17	16	13	10	11	9	7	35	17	6	62
354	2013	822+9	149	08-juil	23	22	43	0.176	-0.026092	F	25	Warm	Warm	38	0	0								0													27	22	17	16	13	10	11	9	7	35	17	6	62
115	2013	0+766	561+9	29-juin	14	20	40	0.155	-0.0125172	F	25	Warm	Warm	38	0	1	45	96	1.69	-0.120215	25	56	1.535	1	1	56	114	3.72	0.516166	36	74	3.565	2014-07-05	185	1	5	27	22	17	16	13	10	11	9	7	35	17	6	62
305	2013	761+9	3291+9	29-juin	14	20	40	0.203	0.0354828	M	25	Warm	Warm	38	0	1	32	70	0.84	0.188845	12	30	0.637	0	0												27	22	17	16	13	10	11	9	7	35	17	6	62
59	2013	0+704	3303+9	22-juin	7	21	46	0.195	0.0101954	M	25	Warm	Warm	38	0	0								0													27	22	17	16	13	10	11	9	7	35	17	6	62
332	2013	794+9	0+62	04-juil	19	21	43	0.184	-0.000804609	F	25	Warm	Warm	38	0	0								0													27	22	17	16	13	10	11	9	7	35	17	6	62
147	2013	0+802	0+175	05-juil	20	21	47	0.197	0.0121954	M	25	Warm	Warm	38	0	1	38	84	1.21	0.0238944	17	37	1.013	0	0												27	22	17	16	13	10	11	9	7	35	17	6	62
41	2013	0+684	3262+9	21-juin	6	21	47	0.22	0.0351954	M	25	Warm	Warm	38	0	0								0													27	22	17	16	13	10	11	9	7	35	17	6	62
304	2013	758+9	3291+9	29-juin	14	20	41	0.194	0.0264828	F	25	Warm	Warm	38	0	0								0													27	22	17	16	13	10	11	9	7	35	17	6	62
351	2013	817+9	149	08-juil	23	21	43	0.191	0.00619539	F	25	Warm	Warm	38	0	0								0													27	22	17	16	13	10	11	9	7	35	17	6	62
95	2013	0+744	115	27-juin	12	21	45	0.17	-0.0148046	M	25	Warm	Warm	38	0	1	40	92	1.51	0.145577	19	47	1.34	0	0												27	22	17	16	13	10	11	9	7	35	17	6	62
54	2013	0+698	3303+9	22-juin	7	21	44	0.192	0.00719539	M	25	Warm	Warm	38	0	1	51	116	2.89	0.544834	30	72	2.698	1	1	54	117	3.2	0.24318	33	73	3.008					27	22	17	16	13	10	11	9	7	35	17	6	62
44	2013	0+687	3262+9	21-juin	6	22	46	0.201	-0.00109198	F	25	Warm	Warm	38	0	0								0													27	22	17	16	13	10	11	9	7	35	17	6	62
99	2013	0+748	115	27-juin	12	22	45	0.188	-0.014092	F	25	Warm	Warm	38	0	0								0													27	22	17	16	13	10	11	9	7	35	17	6	62
180	2013	0+840	0+535	20-juil	35	22	47	0.203	0.000908025	M	25	Warm	Warm	38	0	0								0													27	22	17	16	13	10	11	9	7	35	17	6	62
116	2013	0+767	561+9	29-juin	14	21	43	0.201	0.0161954	F	25	Warm	Warm	38	0	1	47	103	1.99	0.00146797	26	60	1.789	0	0												27	22	17	16	13	10	11	9	7	35	17	6	62
100	2013	0+750	115	27-juin	12	21	43	0.182	-0.00280461	F	25	Warm	Warm	38	0	1	47	83	1.15	-0.838532	26	40	0.968	0	0												27	22	17	16	13	10	11	9	7	35	17	6	62
334	2013	796+9	0+62	04-juil	19	22	44	0.183	-0.019092	F	25	Warm	Warm	38	0	0								0													27	22	17	16	13	10	11	9	7	35	17	6	62
331	2013	793+9	0+62	04-juil	19	20	43	0.191	0.0234828	M	25	Warm	Warm	38	0	0								0													27	22	17	16	13	10	11	9	7	35	17	6	62
146	2013	0+801	0+175	05-juil	20	21	47	0.201	0.0161954	M	25	Warm	Warm	38	0	0								0													27	22	17	16	13	10	11	9	7	35	17	6	62
306	2013	762+9	3291+9	29-juin	14	20	42	0.198	0.0304828	M	25	Warm	Warm	38	0	1	39	90	1.52	0.244736	19	48	1.322	0	0												27	22	17	16	13	10	11	9	7	35	17	6	62
179	2013	0+838	0+535	20-juil	35	23	46	0.202	-0.0173793	M	25	Warm	Warm	38	0	0								0													27	22	17	16	13	10	11	9	7	35	17	6	62
58	2013	0+703	3303+9	22-juin	7	21	45	0.181	-0.00380461	F	25	Warm	Warm	38	0	1	45	49	1.32	-0.490215	24	4	1.139	0	0												27	22	17	16	13	10	11	9	7	35	17	6	62
43	2012	0+457	412	2012-06-17	10	23	45	0.185	-0.0343793	F	26	Warm	Warm	38	0	1	49	107	2.08	-0.086849	26	62	1.895	0	0												27	18	13	15	10	6	12	8	7	37	17	3	64
40	2012	0+411	30	2012-06-09	2	18	34	0.113	-0.0199425	F	26	Warm	Warm	38	0	0								0													27	18	13	15	10	6	12	8	7	37	17	3	64
46	2012	0+501	79	2012-06-20	13	22	45	0.205	0.00290802	M	26	Warm	Warm	38	0	0								0													27	18	13	15	10	6	12	8	7	37	17	3	64
47	2012	0+502	79	2012-06-20	13	23	46	0.209	-0.0103793	F	26	Warm	Warm	38	0	0								0													27	18	13	15	10	6	12	8	7	37	17	3	64
44	2012	0+458	412	2012-06-17	10	23	48	0.18	-0.0393793	M	26	Warm	Warm	38	0	1	48	110	2.24	0.162309	25	62	2.06	0	0												27	18	13	15	10	6	12	8	7	37	17	3	64
45	2012	0+500	79	2012-06-20	13	21	44	0.182	-0.00280461	M	26	Warm	Warm	38	0	0								0													27	18	13	15	10	6	12	8	7	37	17	3	64
58	2012	0+521	438	2012-06-21	14	21	46	0.2	0.0151954	M	26	Warm	Warm	38	0	1	45	104	1.63	-0.180215	24	58	1.43	0	0												27	18	13	15	10	6	12	8	7	37	17	3	64
59	2012	0+530	285+9	2012-06-23	16	22	46	0.184	-0.018092	F	26	Warm	Warm	38	0	1	47	105	1.81	-0.178532	25	59	1.626	0	0												27	18	13	15	10	6	12	8	7	37	17	3	64
60	2012	0+531	285+9	2012-06-23	16	22	45	0.182	-0.020092	F	26	Warm	Warm	38	0	0								0													27	18	13	15	10	6	12	8	7	37	17	3	64
48	2012	0+503	79	2012-06-20	13	24	47	0.221	-0.0156667	F	26	Warm	Warm	38	0	1	52	104	2.2	-0.234324	28	57	1.979	0	0												27	18	13	15	10	6	12	8	7	37	17	3	64
49	2012	0+504	79	2012-06-20	13	23	48	0.215	-0.00437934	M	26	Warm	Warm	38	0	1	49	110	2.35	0.183151	26	62	2.135	0	0												27	18	13	15	10	6	12	8	7	37	17	3	64
50	2012	0+505	79	2012-06-20	13	22	46	0.205	0.00290802	M	26	Warm	Warm	38	0	0								0													27	18	13	15	10	6	12	8	7	37	17	3	64
52	2012	0+507	79	2012-06-20	13	22	44	0.186	-0.016092	F	26	Warm	Warm	38	0	1	49	97	1.75	-0.416849	27	53	1.564	0	0												27	18	13	15	10	6	12	8	7	37	17	3	64
53	2012	0+515	438	2012-06-21	14	21	47	0.2	0.0151954	M	26	Warm	Warm	38	0	0								0													27	18	13	15	10	6	12	8	7	37	17	3	64
54	2012	0+516	438	2012-06-21	14	23	48	0.191	-0.0283793	F	26	Warm	Warm	38	0	0								0													27	18	13	15	10	6	12	8	7	37	17	3	64
55	2012	0+517	438	2012-06-21	14	20	46	0.199	0.0314828	M	26	Warm	Warm	38	0	0								0													27	18	13	15	10	6	12	8	7	37	17	3	64
56	2012	0+518	438	2012-06-21	14	22	48	0.191	-0.011092	F	26	Warm	Warm	38	0	1	44	97	1.56	-0.161057	22	49	1.369	0	0												27	18	13	15	10	6	12	8	7	37	17	3	64
57	2012	0+520	438	2012-06-21	14	23	48	0.21	-0.00937934	F	26	Warm	Warm	38	0	1	46	97	1.61	-0.289374	23	49	1.4	0	0												27	18	13	15	10	6	12	8	7	37	17	3	64
71	2012	442+9	126	2012-06-16	9	21	46	0.217	0.0321954	M	26	Warm	Warm	38	0	0								0													27	18	13	15	10	6	12	8	7	37	17	3	64
72	2012	443+9	126	2012-06-16	9	20	36	0.148	-0.0195172	F	26	Warm	Warm	38	0	0								0													27	18	13	15	10	6	12	8	7	37	17	3	64
73	2012	476+9	126	2012-06-16	9	22	42	0.178	-0.024092	F	26	Warm	Warm	38	0	1	42	84	1.48	-0.0627396	20	42	1.302	0	0												27	18	13	15	10	6	12	8	7	37	17	3	64
61	2012	0+532	285+9	2012-06-23	16	21	44	0.179	-0.00580461	M	26	Warm	Warm	38	0	0								0													27	18	13	15	10	6	12	8	7	37	17	3	64
62	2012	0+533	285+9	2012-06-23	16	21	44	0.194	0.00919539	M	26	Warm	Warm	38	0	0								0													27	18	13	15	10	6	12	8	7	37	17	3	64
63	2012	0+534	285+9	2012-06-23	16	22	47	0.184	-0.018092	M	26	Warm	Warm	38	0	1	41	95	1.54	0.0864189	19	48	1.356	0	0												27	18	13	15	10	6	12	8	7	37	17	3	64
64	2012	0+535	285+9	2012-06-23	16	21	45	0.191	0.00619539	F	26	Warm	Warm	38	0	1	43	96	1.55	-0.0818981	22	51	1.359	1	1	55	96	3.094	0.013673	34	51	2.903	2013-07-20	200	1	4	27	18	13	15	10	6	12	8	7	37	17	3	64
65	2012	0+561	0+7+8+10+700+40	2012-06-27	20	24	50	0.24	0.00333329	F	26	Warm	Warm	38	0	1	51	65	1.79	-0.555166	27	15	1.55	1	1	61	98	3.622	-0.19937	37	48	3.382	2013-07-10	190	1	3	27	18	13	15	10	6	12	8	7	37	17	3	64
67	2012	0+563	0+7+8+10+700+40	2012-06-27	20	24	52	0.26	0.0233333	F	26	Warm	Warm	38	0	0								0													27	18	13	15	10	6	12	8	7	37	17	3	64
69	2012	438+9	126	2012-06-16	9	16	31	0.094	-0.00436778	F	26	Warm	Warm	38	0	0								0													27	18	13	15	10	6	12	8	7	37	17	3	64
70	2012	441+9	126	2012-06-16	9	23	37	0.136	-0.0833793	M	26	Warm	Warm	38	0	0								0													27	18	13	15	10	6	12	8	7	37	17	3	64
75	2012	593+9	0+110	2012-06-30	23	22	49	0.226	0.023908	M	26	Warm	Warm	38	0	1	46	108	1.94	0.0406265	24	59	1.714	0	0												27	18	13	15	10	6	12	8	7	37	17	3	64
74	2012	592+9	0+110	2012-06-30	23	22	47	0.213	0.010908	M	26	Warm	Warm	38	0	0								0													27	18	13	15	10	6	12	8	7	37	17	3	64
71	2013	0+717	470	24-juin	9	22	46	0.194	-0.00809198	M	26	Present	Present	28	0	0								0													27	19	9	16	13	6	11	6	3	35	21	6	62
72	2013	0+718	470	24-juin	9	22	46	0.187	-0.015092	F	26	Present	Present	28	0	0								0													27	19	9	16	13	6	11	6	3	35	21	6	62
315	2013	773+9	118	30-juin	15	22	47	0.219	0.016908	M	26	Present	Present	28	0	0								0													27	19	9	16	13	6	11	6	3	35	21	6	62
131	2013	0+784	108	01-juil	16	22	48	0.259	0.056908	F	26	Present	Present	28	0	1	46	103	1.97	0.0706265	24	55	1.711	0	0												27	19	9	16	13	6	11	6	3	35	21	6	62
169	2013	0+827	116	15-juil	30	21	44	0.19	0.00519539	F	26	Present	Present	28	0	0								0													27	19	9	16	13	6	11	6	3	35	21	6	62
335	2013	797+9	697+9	05-juil	20	21	40	0.164	-0.0208046	M	26	Present	Present	28	0	1	42	94	1.49	-0.0527396	21	54	1.326	0	0												27	19	9	16	13	6	11	6	3	35	21	6	62
130	2013	0+783	108	01-juil	16	21	45	0.236	0.0511954	M	26	Present	Present	28	0	1	44	106	1.88	0.158943	23	61	1.644	1	1	53	123	3.31	0.476687	32	78	3.074					27	19	9	16	13	6	11	6	3	35	21	6	62
107	2013	0+757	245	28-juin	13	21	44	0.192	0.00719539	M	26	Present	Present	28	0	1	48	82	2.24	0.162309	27	38	2.048	0	0												27	19	9	16	13	6	11	6	3	35	21	6	62
377	2013	851+9	0+615	23-juil	38	20	42	0.158	-0.00951724	M	26	Present	Present	28	0	1	37	85	1.03	-0.0669472	17	43	0.872	1	1	53	125	2.97	0.136687	33	83	2.812					27	19	9	16	13	6	11	6	3	35	21	6	62
175	2013	0+834	407+9	16-juil	31	22	46	0.202	-9.19753e-05	F	26	Present	Present	28	0	1	39	90	1.28	0.00473587	17	44	1.078	1	1	52	68	2.36	-0.349805	30	22	2.158	2014-07-10	190	1	6	27	19	9	16	13	6	11	6	3	35	21	6	62
229	2013	665+9	3238+9	21-juin	6	21	41	0.177	-0.00780461	M	26	Present	Present	28	0	1	43	87	1.46	-0.171898	22	46	1.283	0	0												27	19	9	16	13	6	11	6	3	35	21	6	62
138	2013	0+792	517+9	04-juil	19	22	44	0.193	-0.00909198	M	26	Present	Present	28	0	0								0													27	19	9	16	13	6	11	6	3	35	21	6	62
230	2013	666+9	3238+9	21-juin	6	21	44	0.21	0.0251954	F	26	Present	Present	28	0	0								0													27	19	9	16	13	6	11	6	3	35	21	6	62
312	2013	768+9	118	30-juin	15	22	46	0.213	0.010908	F	26	Present	Present	28	0	1	46	101	1.75	-0.149374	24	55	1.537	0	0												27	19	9	16	13	6	11	6	3	35	21	6	62
259	2013	703+9	AF_129	23-juin	8	22	46	0.195	-0.00709198	M	26	Present	Present	28	0	1	47	108	1.67	-0.318532	25	62	1.475	0	0												27	19	9	16	13	6	11	6	3	35	21	6	62
73	2013	0+720	470	24-juin	9	21	46	0.207	0.0221954	F	26	Present	Present	28	0	1	46	104	1.96	0.0606265	25	58	1.753	0	0												27	19	9	16	13	6	11	6	3	35	21	6	62
139	2013	0+793	517+9	04-juil	19	22	48	0.215	0.012908	F	26	Present	Present	28	0	1	45	92	1.78	-0.0302151	23	44	1.565	0	0												27	19	9	16	13	6	11	6	3	35	21	6	62
192	2013	617+9	3346+9	15-juin	0	19	39	0.16	0.00977012	M	26	Present	Present	28	0	0								0													27	19	9	16	13	6	11	6	3	35	21	6	62
196	2013	623+9	3346+9	15-juin	0	18	34	0.113	-0.0199425	F	26	Present	Present	28	0	0								0													27	19	9	16	13	6	11	6	3	35	21	6	62
264	2013	708+9	AF_129	23-juin	8	22	46	0.187	-0.015092	M	26	Present	Present	28	0	0								0													27	19	9	16	13	6	11	6	3	35	21	6	62
171	2013	0+830	407+9	16-juil	31	21	43	0.19	0.00519539	M	26	Present	Present	28	0	1	33	86	1.23	0.489687	12	43	1.04	0	0												27	19	9	16	13	6	11	6	3	35	21	6	62
134	2013	0+787	517+9	04-juil	19	21	45	0.206	0.0211954	F	26	Present	Present	28	0	1	48	108	2.12	0.0423095	27	63	1.914	1	1	52	65	2.59	-0.119805	31	20	2.384			0		27	19	9	16	13	6	11	6	3	35	21	6	62
232	2013	668+9	3238+9	21-juin	6	21	44	0.218	0.0331954	M	26	Present	Present	28	0	1	43	101	1.78	0.148102	22	57	1.562	0	0												27	19	9	16	13	6	11	6	3	35	21	6	62
341	2013	805+9	697+9	05-juil	20	19	41	0.17	0.0197701	M	26	Present	Present	28	0	0								0													27	19	9	16	13	6	11	6	3	35	21	6	62
102	2013	0+752	376	27-juin	12	21	44	0.185	0.000195391	M	26	Present	Present	28	0	0								0													27	19	9	16	13	6	11	6	3	35	21	6	62
68	2013	0+714	470	24-juin	9	23	46	0.206	-0.0133793	F	26	Present	Present	28	0	1	44	101	2.13	0.408943	21	55	1.924	0	0												27	19	9	16	13	6	11	6	3	35	21	6	62
302	2013	756+9	80A	28-juin	13	22	46	0.189	-0.013092	F	26	Present	Present	28	0	1	47	105	1.85	-0.138532	25	59	1.661	1	1	53	87	2.72	-0.113313	31	41	2.531			0		27	19	9	16	13	6	11	6	3	35	21	6	62
170	2013	0+828	407+9	16-juil	31	22	45	0.226	0.023908	F	26	Present	Present	28	0	1	42	83	1.27	-0.27274	20	38	1.044	0	0												27	19	9	16	13	6	11	6	3	35	21	6	62
3	2013	0+642	3316+9	18-juin	3	18	25	0.11	-0.0229425	M	26	Present	Present	28	0	0								0													27	19	9	16	13	6	11	6	3	35	21	6	62
151	2013	0+806	85	05-juil	20	20	43	0.176	0.00848276	M	26	Present	Present	28	0	0								0													27	19	9	16	13	6	11	6	3	35	21	6	62
191	2013	616+9	3346+9	15-juin	0	20	40	0.156	-0.0115172	F	26	Present	Present	28	0	0								0													27	19	9	16	13	6	11	6	3	35	21	6	62
336	2013	798+9	697+9	05-juil	20	20	42	0.177	0.00948276	M	26	Present	Present	28	0	1	43	102	1.79	0.158102	23	60	1.613	0	0												27	19	9	16	13	6	11	6	3	35	21	6	62
130	2012	0+597	0+3000	2012-06-29	22	22	49	0.192	-0.010092	F	28	Warm	Warm	38	0	1	47	103	1.82	-0.168532	25	54	1.628	0	0												27	10	8	15	6	5	12	4	3	42	27	16	69
131	2012	0+598	0+3000	2012-06-29	22	21	47	0.202	0.0171954	F	28	Warm	Warm	38	0	1	40	90	1.49	0.125577	19	43	1.288	0	0												27	10	8	15	6	5	12	4	3	42	27	16	69
132	2012	0+600	0+3000	2012-06-29	22	21	47	0.197	0.0121954	M	28	Warm	Warm	38	0	0								0													27	10	8	15	6	5	12	4	3	42	27	16	69
133	2012	0+601	0+3000	2012-06-29	22	21	49	0.193	0.00819539	M	28	Warm	Warm	38	0	0								0													27	10	8	15	6	5	12	4	3	42	27	16	69
134	2012	0+612	289	2012-07-05	28	20	42	0.128	-0.0395172	F	28	Warm	Warm	38	0	1	38	72	1.04	-0.146106	18	30	0.912	1	1	47	86	1.581	-0.511269	27	44	1.453			0		27	10	8	15	6	5	12	4	3	42	27	16	69
135	2012	0+613	289	2012-07-05	28	19	41	0.126	-0.0242299	M	28	Warm	Warm	38	0	1	36	70	1.02	0.0122113	17	29	0.894	1	1	43	83	1.429	-0.16924	24	42	1.303					27	10	8	15	6	5	12	4	3	42	27	16	69
136	2012	0+614	289	2012-07-05	28	20	39	0.117	-0.0505172	F	28	Warm	Warm	38	0	1	45	93	1.6	-0.210215	25	54	1.483	1	1	52	108	2.524	-0.185805	32	69	2.407			0		27	10	8	15	6	5	12	4	3	42	27	16	69
137	2012	0+615	289	2012-07-05	28	19	39	0.125	-0.0252299	F	28	Warm	Warm	38	0	1	41	92	1.33	-0.123581	22	53	1.205	1	1	51	110	2.106	-0.480298	32	71	1.981	2013-07-23	203	1	3	27	10	8	15	6	5	12	4	3	42	27	16	69
138	2012	0+616	289	2012-07-05	28	20	38	0.122	-0.0455172	F	28	Warm	Warm	38	0	1	44	94	1.6	-0.121057	24	56	1.478	1	1	55	118	3.039	-0.041327	35	80	2.917	2013-07-18	198	1	1	27	10	8	15	6	5	12	4	3	42	27	16	69
152	2012	504+9	0+315	2012-06-20	13	22	46	0.188	-0.014092	M	28	Warm	Warm	38	0	0								0													27	10	8	15	6	5	12	4	3	42	27	16	69
153	2012	505+9	0+315	2012-06-20	13	21	45	0.165	-0.0198046	F	28	Warm	Warm	38	0	0								0													27	10	8	15	6	5	12	4	3	42	27	16	69
141	2012	401+9	33	2012-06-08	1	22	43	0.206	0.00390802	M	28	Warm	Warm	38	0	1	55	130	3.64	0.9382	33	87	3.434	1	1	59	135	4.346	0.771644	37	92	4.14					27	10	8	15	6	5	12	4	3	42	27	16	69
142	2012	402+9	33	2012-06-08	1	23	46	0.23	0.0106207	M	28	Warm	Warm	38	0	1								0													27	10	8	15	6	5	12	4	3	42	27	16	69
143	2012	403+9	33	2012-06-08	1	22	44	0.215	0.012908	F	28	Warm	Warm	38	0	1	59	122	3.75	0.691566	37	78	3.535	1	1	62	130	4.357	0.412122	40	86	4.142	2013-06-27	177	1	4	27	10	8	15	6	5	12	4	3	42	27	16	69
144	2012	404+9	33	2012-06-08	1	22	46	0.22	0.017908	M	28	Warm	Warm	38	0	1	54	133	3.75	1.13736	32	87	3.53	0	0												27	10	8	15	6	5	12	4	3	42	27	16	69
146	2012	454+9	2	2012-06-17	10	23	49	0.212	-0.00737934	F	28	Warm	Warm	38	0	1								0													27	10	8	15	6	5	12	4	3	42	27	16	69
147	2012	455+9	2	2012-06-17	10	20	37	0.107	-0.0605172	M	28	Warm	Warm	38	0	0								0													27	10	8	15	6	5	12	4	3	42	27	16	69
148	2012	456+9	2	2012-06-17	10	20	42	0.157	-0.0105172	M	28	Warm	Warm	38	0	0								0													27	10	8	15	6	5	12	4	3	42	27	16	69
149	2012	501+9	0+315	2012-06-20	13	20	43	0.182	0.0144828	M	28	Warm	Warm	38	0	0								0													27	10	8	15	6	5	12	4	3	42	27	16	69
150	2012	502+9	0+315	2012-06-20	13	20	44	0.192	0.0244828	M	28	Warm	Warm	38	0	1	50	120	2.87	0.613993	30	76	2.678	1	1	52	128	3.212	0.502195	32	84	3.02					27	10	8	15	6	5	12	4	3	42	27	16	69
151	2012	503+9	0+315	2012-06-20	13	21	47	0.2	0.0151954	F	28	Warm	Warm	38	0	1	51	112	2.7	0.354834	30	65	2.5	0	0												27	10	8	15	6	5	12	4	3	42	27	16	69
156	2012	551+9	PAD+PAG+PPG+1900+400	2012-06-24	17	22	48	0.208	0.00590802	M	28	Warm	Warm	38	0	1								1	1	57	134	3.441	0.113659	35	86	3.233					27	10	8	15	6	5	12	4	3	42	27	16	69
161	2012	564+9	110A	2012-06-26	19	20	44	0.177	0.00948276	M	28	Warm	Warm	38	0	1	40	85	1.3	-0.0644226	20	41	1.123	1	1	51	91	2.432	-0.154298	31	47	2.255					27	10	8	15	6	5	12	4	3	42	27	16	69
154	2012	547+9	PAD+PAG+PPG+1900+400	2012-06-24	17	23	50	0.206	-0.0133793	M	28	Warm	Warm	38	0	0								0													27	10	8	15	6	5	12	4	3	42	27	16	69
155	2012	548+9	PAD+PAG+PPG+1900+400	2012-06-24	17	24	50	0.209	-0.0276667	F	28	Warm	Warm	38	0	0								0													27	10	8	15	6	5	12	4	3	42	27	16	69
160	2012	563+9	110A	2012-06-26	19	20	42	0.167	-0.000517243	M	28	Warm	Warm	38	0	0								0													27	10	8	15	6	5	12	4	3	42	27	16	69
158	2012	558+9	110A	2012-06-26	19	21	46	0.175	-0.00980461	M	28	Warm	Warm	38	0	1	45	103	1.96	0.149785	24	57	1.785	0	0												27	10	8	15	6	5	12	4	3	42	27	16	69
159	2012	561+9	110A	2012-06-26	19	21	43	0.17	-0.0148046	F	28	Warm	Warm	38	0	1	49	102	2	-0.166849	28	59	1.83	1	1	59	93	3.355	-0.219356	38	50	3.185	2013-06-29	179	1	6	27	10	8	15	6	5	12	4	3	42	27	16	69
362	2012	556+9	PAD+PAG+PPG+1900+400	2012-06-24	17	22	48	0.208	0.00590802	M	28	Warm	Warm	38	0	1	52	123	2.68	0.245676				1	1	54	123	2.66	-0.29682	32	75	2.452					27	10	8	15	6	5	12	4	3	42	27	16	69
120	2012	0+460	AF_129	2012-06-17	10	23	46	0.223	0.00362066	F	28	Warm	Warm	38	0	1	54	114	3.06	0.447359	31	68	2.837	0													27	10	8	15	6	5	12	4	3	42	27	16	69
121	2012	0+461	AF_129	2012-06-17	10	24	48	0.241	0.00433329	M	28	Warm	Warm	38	0	1	55	114	3.34	0.6382	31	66	3.099	1	1	56	111	3.53	0.326166	32	63	3.289					27	10	8	15	6	5	12	4	3	42	27	16	69
122	2012	0+462	AF_129	2012-06-17	10	23	47	0.233	0.0136207	M	28	Warm	Warm	38	0	0								0													27	10	8	15	6	5	12	4	3	42	27	16	69
123	2012	0+463	AF_129	2012-06-17	10	23	49	0.237	0.0176207	F	28	Warm	Warm	38	0	0								0	0												27	10	8	15	6	5	12	4	3	42	27	16	69
124	2012	0+464	AF_129	2012-06-17	10	22	46	0.229	0.026908	M	28	Warm	Warm	38	0	1	53	122	3.53	1.00652	31	76	3.301	0	0												27	10	8	15	6	5	12	4	3	42	27	16	69
125	2012	0+466	AF_129	2012-06-17	10	23	47	0.231	0.0116207	M	28	Warm	Warm	38	0	1	50	114	2.74	0.483993	27	67	2.509	0	0												27	10	8	15	6	5	12	4	3	42	27	16	69
139	2012	0+617	289	2012-07-05	28	19	40	0.118	-0.0322299	F	28	Warm	Warm	38	0	0								0													27	10	8	15	6	5	12	4	3	42	27	16	69
140	2012	0+618	289	2012-07-05	28	18	36	0.106	-0.0269425	M	28	Warm	Warm	38	0	0								0													27	10	8	15	6	5	12	4	3	42	27	16	69
128	2012	0+595	0+3000	2012-06-29	22	23	49	0.199	-0.0203793	F	28	Warm	Warm	38	0	1	49	107	2.04	-0.126849	26	58	1.841	1	1	56	122	2.829	-0.374834	33	73	2.63	2013-07-16	196	1	3	27	10	8	15	6	5	12	4	3	42	27	16	69
129	2012	0+596	0+3000	2012-06-29	22	21	47	0.19	0.00519539	M	28	Warm	Warm	38	0	1	50	113	2.05	-0.206007	29	66	1.86	1	1	55	131	3.174	0.093673	34	84	2.984					27	10	8	15	6	5	12	4	3	42	27	16	69
203	2012	554+9	PAD+PAG+PPG+1900+400	2012-06-24	17	23	51	0.209	-0.0103793	F	28	Warm	Warm	38	0	1	50	113	2.21	-0.0460075				1	1	60	95	3.384	-0.313863	37	44	3.175	2013-07-09	189	1	6	27	10	8	15	6	5	12	4	3	42	27	16	69
361	2012	555+9	PAD+PAG+PPG+1900+400	2012-06-24	17	22	46	0.198	-0.00409198	F	28	Warm	Warm	38	0	0								0													27	10	8	15	6	5	12	4	3	42	27	16	69
34	2013	0+676	3220+9	21-juin	6	20	41	0.185	0.0174828	M	28	Present	Present	28	0	1	41	91	1.58	0.126419	21	50	1.395	0	0												26	23	19	15	13	11	11	10	8	34	24	12	60
277	2013	725+9	3218+9	26-juin	11	21	44	0.185	0.000195391	M	28	Present	Present	28	0	0								0													26	23	19	15	13	11	11	10	8	34	24	12	60
189	2013	0+850	PPG+0+200	24-juil	39	20	40	0.152	-0.0155172	F	28	Present	Present	28	0	1	35	77	0.83	-0.0886302	15	37	0.678	0	0												26	23	19	15	13	11	11	10	8	34	24	12	60
148	2013	0+803	0+175	05-juil	20	21	46	0.201	0.0161954	M	28	Present	Present	28	0	1	45	107	1.94	0.129785	24	61	1.739	0	0												26	23	19	15	13	11	11	10	8	34	24	12	60
352	2013	818+9	149	08-juil	23	22	44	0.17	-0.032092	F	28	Present	Present	28	0	1	42	89	1.28	-0.26274	20	45	1.11	0	0												26	23	19	15	13	11	11	10	8	34	24	12	60
222	2013	656+9	3260+9	19-juin	4	20	38	0.172	0.00448276	F	28	Present	Present	28	0	1	36	76	1.06	0.0522113	16	38	0.888	1	1	44	93	1.93	0.208253	24	55	1.758			0		26	23	19	15	13	11	11	10	8	34	24	12	60
245	2013	685+9	126	22-juin	7	23	41	0.218	-0.00137934	F	28	Present	Present	28	0	0								0													26	23	19	15	13	11	11	10	8	34	24	12	60
246	2013	686+9	126	22-juin	7	22	48	0.219	0.016908	M	28	Present	Present	28	0	1	44	104	1.93	0.208943	22	56	1.711	0	0												26	23	19	15	13	11	11	10	8	34	24	12	60
75	2013	0+722	148	25-juin	10	22	46	0.202	-9.19753e-05	M	28	Present	Present	28	0	1	51	122	3.08	0.734834	29	76	2.878	1	1	53	122	3.34	0.506687	31	76	3.138					26	23	19	15	13	11	11	10	8	34	24	12	60
40	2013	0+683	3251+9	21-juin	6	17	33	0.096	-0.0196551	M	28	Present	Present	28	0	0								0													26	23	19	15	13	11	11	10	8	34	24	12	60
92	2013	0+741	3273+9	27-juin	12	21	43	0.188	0.00319539	F	28	Present	Present	28	0	1	41	89	1.35	-0.103581	20	46	1.162	1	1	52	100	2.35	-0.359805	31	57	2.162			0		26	23	19	15	13	11	11	10	8	34	24	12	60
224	2013	658+9	3260+9	19-juin	4	22	46	0.212	0.00990802	F	28	Present	Present	28	0	1	50	108	2.32	0.0639925	28	62	2.108	1	1	56	93	2.98	-0.223834	34	47	2.768			0		26	23	19	15	13	11	11	10	8	34	24	12	60
78	2013	0+725	148	25-juin	10	21	44	0.198	0.0131954	M	28	Present	Present	28	0	1	42	106	2.35	0.80726	21	62	2.152	1	1	53	106	3.26	0.426687	32	62	3.062					26	23	19	15	13	11	11	10	8	34	24	12	60
202	2013	631+9	3217+9	17-juin	2	18	35	0.103	-0.0299425	M	28	Present	Present	28	0	0								0													26	23	19	15	13	11	11	10	8	34	24	12	60
91	2013	0+740	3273+9	27-juin	12	21	46	0.2	0.0151954	M	28	Present	Present	28	0	0								0													26	23	19	15	13	11	11	10	8	34	24	12	60
362	2013	832+9	436+9	13-juil	28	23	49	0.239	0.0196207	M	28	Present	Present	28	0	1	42	93	1.41	-0.13274	19	44	1.171	1	1	52	114	2.76	0.0501947	29	65	2.521					26	23	19	15	13	11	11	10	8	34	24	12	60
353	2013	821+9	149	08-juil	23	22	44	0.186	-0.016092	F	28	Present	Present	28	0	1	41	92	1.33	-0.123581	19	48	1.144	1	1	56	112	3	-0.203834	34	68	2.814	2014-07-11	191	1	1	26	23	19	15	13	11	11	10	8	34	24	12	60
177	2013	0+836	0+616	20-juil	35	22	45	0.15	-0.052092	F	28	Present	Present	28	0	1	36	82	0.92	-0.0877887	14	37	0.77	1	1	51	90	1.97	-0.616298	29	45	1.82			0		26	23	19	15	13	11	11	10	8	34	24	12	60
150	2013	0+805	0+175	05-juil	20	22	46	0.195	-0.00709198	M	28	Present	Present	28	0	1	46	77	1.91	0.0106265	24	31	1.715	1	1	53	112	3.25	0.416687	31	66	3.055					26	23	19	15	13	11	11	10	8	34	24	12	60
141	2013	0+795	3213+9	04-juil	19	20	40	0.177	0.00948276	M	28	Present	Present	28	0	1	38	89	1.33	0.143894	18	49	1.153														26	23	19	15	13	11	11	10	8	34	24	12	60
276	2013	724+9	3218+9	26-juin	11	22	46	0.186	-0.016092	F	28	Present	Present	28	0	0								0													26	23	19	15	13	11	11	10	8	34	24	12	60
140	2013	0+794	3213+9	04-juil	19	21	45	0.193	0.00819539	F	28	Present	Present	28	0	1	32	95	1.4	0.748845	11	50	1.207	0	0												26	23	19	15	13	11	11	10	8	34	24	12	60
89	2013	0+737	3273+9	27-juin	12	20	44	0.176	0.00848276	M	28	Present	Present	28	0	1	37	88	1.26	0.163053	17	44	1.084	1	1	51	112	2.51	-0.0762981	31	68	2.334					26	23	19	15	13	11	11	10	8	34	24	12	60
149	2013	0+804	0+175	05-juil	20	22	47	0.206	0.00390802	F	28	Present	Present	28	0	1	45	103	1.84	0.0297849	23	56	1.634	0	0												26	23	19	15	13	11	11	10	8	34	24	12	60
281	2013	731+9	3218+9	26-juin	11	22	46	0.192	-0.010092	M	28	Present	Present	28	0	1	45	104	1.84	0.0297849	23	58	1.648	1	1	52	113	3.1	0.390195	30	67	2.908					26	23	19	15	13	11	11	10	8	34	24	12	60
188	2013	0+848	PPG+0+200	24-juil	39	18	39	0.133	5.74902e-05	M	28	Present	Present	28	0	0								0													26	23	19	15	13	11	11	10	8	34	24	12	60
223	2013	657+9	3260+9	19-juin	4	22	43	0.196	-0.00609198	F	28	Present	Present	28	0	1	54	108	2.92	0.307359	32	65	2.724	0	0												26	23	19	15	13	11	11	10	8	34	24	12	60
77	2013	0+724	148	25-juin	10	22	46	0.201	-0.00109198	F	28	Present	Present	28	0	1	51	105	2.25	-0.095166	29	59	2.049	1	1	58	117	3.69	0.239151	36	71	3.489	2014-07-02	182	1	4	26	23	19	15	13	11	11	10	8	34	24	12	60
282	2013	732+9	3218+9	26-juin	11	18	33	0.132	-0.00094251	M	28	Present	Present	28	0	0								0													26	23	19	15	13	11	11	10	8	34	24	12	60
274	2013	722+9	3308+9	25-juin	10	23	46	0.242	0.0226207	F	28	Present	Present	28	0	0								0													26	23	19	15	13	11	11	10	8	34	24	12	60
308	2013	764+9	PPD	29-juin	14	21	47	0.244	0.0591954	M	28	Present	Present	28	0	1	45	112	2.33	0.519785	24	65	2.086	0	0												26	23	19	15	13	11	11	10	8	34	24	12	60
247	2013	687+9	126	22-juin	7	22	47	0.203	0.000908025	F	28	Present	Present	28	0	1	50	103	2.01	-0.246007	28	56	1.807	0	0												26	23	19	15	13	11	11	10	8	34	24	12	60
243	2013	683+9	126	22-juin	7	22	46	0.21	0.00790802	F	28	Present	Present	28	0	0								0													26	23	19	15	13	11	11	10	8	34	24	12	60
7	2013	0+646	3241+9	18-juin	3	22	46	0.209	0.00690802	M	29	Warm	Warm	38	0	0								0													26	23	13	15	12	4	11	11	9	36	18	7	62
53	2013	0+697	3672+0+4+8+9+40+100	22-juin	7	22	45	0.236	0.033908	M	29	Warm	Warm	38	0	0								0													26	23	13	15	12	4	11	11	9	36	18	7	62
173	2013	0+832	407+9	16-juil	31	21	47	0.211	0.0261954	M	29	Warm	Warm	38	0	0								0													26	23	13	15	12	4	11	11	9	36	18	7	62
187	2013	0+847	PPG+0+200	24-juil	39	17	35	0.12	0.00434486	M	29	Warm	Warm	38	0	0								0													26	23	13	15	12	4	11	11	9	36	18	7	62
174	2013	0+833	407+9	16-juil	31	20	43	0.18	0.0124828	M	29	Warm	Warm	38	0	0								0													26	23	13	15	12	4	11	11	9	36	18	7	62
152	2013	0+807	85	05-juil	20	21	44	0.183	-0.00180461	F	29	Warm	Warm	38	0	1	46	98	1.54	-0.359374	25	54	1.357	0	0												26	23	13	15	12	4	11	11	9	36	18	7	62
127	2013	0+780	148	25-juin	10	22	47	0.207	0.00490802	F	29	Warm	Warm	38	0	0								0													26	23	13	15	12	4	11	11	9	36	18	7	62
231	2013	667+9	3238+9	21-juin	6	20	40	0.15	-0.0175172	F	29	Warm	Warm	38	0	1	43	90	1.5	-0.131898	23	50	1.35	0	0												26	23	13	15	12	4	11	11	9	36	18	7	62
356	2013	824+9	554+9	09-juil	24	21	44	0.144	-0.0408046	F	29	Warm	Warm	38	0	0								0													26	23	13	15	12	4	11	11	9	36	18	7	62
172	2013	0+831	407+9	16-juil	31	21	44	0.2	0.0151954	F	29	Warm	Warm	38	0	0								0													26	23	13	15	12	4	11	11	9	36	18	7	62
186	2013	0+846	PPG+0+200	24-juil	39	20	43	0.183	0.0154828	M	29	Warm	Warm	38	0	0								0													26	23	13	15	12	4	11	11	9	36	18	7	62
110	2013	0+761	245	28-juin	13	21	45	0.209	0.0241954	F	29	Warm	Warm	38	0	1	47	106	2	0.011468	26	61	1.791	0	0												26	23	13	15	12	4	11	11	9	36	18	7	62
225	2013	661+9	3260+9	19-juin	4	20	41	0.19	0.0224828	F	29	Warm	Warm	38	0	1	47	104	1.83	-0.158532	27	63	1.64														26	23	13	15	12	4	11	11	9	36	18	7	62
129	2013	0+782	108	01-juil	16	22	45	0.227	0.024908	F	29	Warm	Warm	38	0	0								0													26	23	13	15	12	4	11	11	9	36	18	7	62
355	2013	823+9	554+9	09-juil	24	19	41	0.136	-0.0142299	M	29	Warm	Warm	38	0	1	48	85	1.34	-0.737691	29	44	1.204	1	1	52	107	3.02	0.310195	33	66	2.884					26	23	13	15	12	4	11	11	9	36	18	7	62
311	2013	767+9	PPD	29-juin	14	22	47	0.223	0.020908	F	29	Warm	Warm	38	0	0								0													26	23	13	15	12	4	11	11	9	36	18	7	62
76	2013	0+723	148	25-juin	10	22	47	0.211	0.00890802	F	29	Warm	Warm	38	0	0								0													26	23	13	15	12	4	11	11	9	36	18	7	62
220	2013	654+9	3260+9	19-juin	4	21	45	0.211	0.0261954	M	29	Warm	Warm	38	0	1	45	108	2.11	0.299785	24	63	1.899	1	1	56	110	3.25	0.0461658	35	65	3.039					26	23	13	15	12	4	11	11	9	36	18	7	62
340	2013	804+9	697+9	05-juil	20	21	43	0.169	-0.0158046	M	29	Warm	Warm	38	0	0								0													26	23	13	15	12	4	11	11	9	36	18	7	62
8	2013	0+647	3241+9	18-juin	3	24	49	0.205	-0.0316667	F	29	Warm	Warm	38	0	1	51	111	2.31	-0.035166	27	62	2.105	0	0												26	23	13	15	12	4	11	11	9	36	18	7	62
108	2013	0+758	245	28-juin	13	21	44	0.197	0.0121954	M	29	Warm	Warm	38	0	1	47	116	2.47	0.481468	26	72	2.273	1	1	53	99	3.1	0.266687	32	55	2.903					26	23	13	15	12	4	11	11	9	36	18	7	62
190	2013	0+851	PPG+0+200	24-juil	39	22	46	0.185	-0.017092	F	29	Warm	Warm	38	0	1	34	74	0.82	-0.00947169	12	28	0.635	1	1	56	100	2.67	-0.533834	34	54	2.485			0		26	23	13	15	12	4	11	11	9	36	18	7	62
228	2013	664+9	3238+9	21-juin	6	21	41	0.142	-0.0428046	F	29	Warm	Warm	38	0	1	42	88	1.44	-0.10274	21	47	1.298	0	0												26	23	13	15	12	4	11	11	9	36	18	7	62
339	2013	803+9	697+9	05-juil	20	21	44	0.187	0.00219539	M	29	Warm	Warm	38	0	1	47	105	1.86	-0.128532	26	61	1.673	1	1	55	129	3.45	0.369673	34	85	3.263					26	23	13	15	12	4	11	11	9	36	18	7	62
63	2013	0+708	3320+9	23-juin	8	21	44	0.212	0.0271954	M	29	Warm	Warm	38	0	0								0													26	23	13	15	12	4	11	11	9	36	18	7	62
64	2013	0+710	3320+9	23-juin	8	21	42	0.184	-0.000804609	F	29	Warm	Warm	38	0	0								0													26	23	13	15	12	4	11	11	9	36	18	7	62
197	2012	511+9	244	2012-06-20	13	21	41	0.166	-0.0188046	F	32	Present	Present	28	0	0								0													27	20	13	15	11	7	12	9	6	45	36	19	72
164	2012	0+440	0+910	2012-06-16	9	21	44	0.2	0.0151954	M	32	Present	Present	28	0	1	47	114	2.27	0.281468	26	70	2.07	1	1	52	123	2.933	0.223195	31	79	2.733					27	20	13	15	11	7	12	9	6	45	36	19	72
165	2012	0+441	0+910	2012-06-16	9	23	47	0.193	-0.0263793	F	32	Present	Present	28	0	1	51	108	2.35	0.00483402	28	61	2.157	1	1	55	115	2.618	-0.462327	32	68	2.425			0		27	20	13	15	11	7	12	9	6	45	36	19	72
167	2012	0+443	0+910	2012-06-16	9	21	40	0.205	0.0201954	M	32	Present	Present	28	0	0								0													27	20	13	15	11	7	12	9	6	45	36	19	72
168	2012	0+444	0+910	2012-06-16	9	21	47	0.199	0.0141954	M	32	Present	Present	28	0	0								0													27	20	13	15	11	7	12	9	6	45	36	19	72
169	2012	0+455	100	2012-06-17	10	25	51	0.271	0.0170459	F	32	Present	Present	28	0	1	49	100	2.01	-0.156849	24	49	1.739	1	1	56	84	2.651	-0.552834	31	33	2.38			0		27	20	13	15	11	7	12	9	6	45	36	19	72
166	2012	0+442	0+910	2012-06-16	9	21	46	0.2	0.0151954	M	32	Present	Present	28	0	0								0													27	20	13	15	11	7	12	9	6	45	36	19	72
127	2012	0+542	142	2012-06-24	17	18	37	0.129	-0.00394251	M	32	Present	Present	28	0	0								0													27	20	13	15	11	7	12	9	6	45	36	19	72
126	2012	0+541	142	2012-06-24	17	21	45	0.164	-0.0208046	F	32	Present	Present	28	0	1	45	99	1.65	-0.160215				0	0												27	20	13	15	11	7	12	9	6	45	36	19	72
181	2012	0+578	1108	2012-06-28	21	21	45	0.192	0.00719539	M	32	Present	Present	28	0	1	44	103	1.65	-0.0710566	23	58	1.458	1	1	51	121	2.363	-0.223298	30	76	2.171					27	20	13	15	11	7	12	9	6	45	36	19	72
182	2012	0+580	1108	2012-06-28	21	22	46	0.189	-0.013092	F	32	Present	Present	28	0	1	47	103	1.73	-0.258532	25	57	1.541	1	1	50	50	2.71	0.247209	28	4	2.521					27	20	13	15	11	7	12	9	6	45	36	19	72
183	2012	0+624	797	2012-07-10	33	21	41	0.153	-0.0318046	M	32	Present	Present	28	0	1	33	63	0.78	0.0396868	12	22	0.627	0	0												27	20	13	15	11	7	12	9	6	45	36	19	72
184	2012	0+626	797	2012-07-13	36	22	45	0.179	-0.023092	M	32	Present	Present	28	0	1	39	77	1.08	-0.195264	17	32	0.901	0	0												27	20	13	15	11	7	12	9	6	45	36	19	72
185	2012	0+627	797	2012-07-13	36	22	45	0.174	-0.028092	M	32	Present	Present	28	0	1	36	75	0.88	-0.127789	14	30	0.706	0	0												27	20	13	15	11	7	12	9	6	45	36	19	72
186	2012	0+628	797	2012-07-13	36	22	43	0.152	-0.050092	M	32	Present	Present	28	0	1	40	85	1.25	-0.114423	18	42	1.098	1	1	47	93	1.622	-0.470269	25	50	1.47					27	20	13	15	11	7	12	9	6	45	36	19	72
174	2012	0+571	1108	2012-06-28	21	21	45	0.182	-0.00280461	M	32	Present	Present	28	0	1	43	98	1.55	-0.0818981	22	53	1.368	1	1	52	122	2.783	0.0731947	31	77	2.601					27	20	13	15	11	7	12	9	6	45	36	19	72
175	2012	0+572	1108	2012-06-28	21	22	47	0.201	-0.00109198	M	32	Present	Present	28	0	1	44	102	1.65	-0.0710566	22	55	1.449	1	1	53	106	2.584	-0.249313	31	59	2.383					27	20	13	15	11	7	12	9	6	45	36	19	72
189	2012	408+9	70+10+6+3	2012-06-07	0	22	47	0.198	-0.00409198	M	32	Present	Present	28	0	0								0													27	20	13	15	11	7	12	9	6	45	36	19	72
190	2012	411+9	70+10+6+3	2012-06-07	0	22	46	0.205	0.00290802	F	32	Present	Present	28	0	0								0													27	20	13	15	11	7	12	9	6	45	36	19	72
191	2012	412+9	70+10+6+3	2012-06-07	0	22	46	0.206	0.00390802	M	32	Present	Present	28	0	1	46	94	1.84	-0.0593735	24	48	1.634	1	1	52	109	2.732	0.0221947	30	63	2.526					27	20	13	15	11	7	12	9	6	45	36	19	72
192	2012	413+9	70+10+6+3	2012-06-07	0	22	39	0.188	-0.014092	M	32	Present	Present	28	0	1	49	58	1.65	-0.516849	27		1.462	1	1	53	91	2.58	-0.253313	31	52	2.392					27	20	13	15	11	7	12	9	6	45	36	19	72
193	2012	414+9	70+10+6+3	2012-06-07	0	23	46	0.196	-0.0233793	F	32	Present	Present	28	0	1	53	104	2.62	0.096517	30	58	2.424	1	1	59	115	3.574	-0.000355907	36	69	3.378	2013-07-25	205	1	6	27	20	13	15	11	7	12	9	6	45	36	19	72
194	2012	506+9	244	2012-06-20	13	19	41	0.174	0.0237701	M	32	Present	Present	28	0	1	41	81	1.66	0.206419	22	40	1.486	0	0												27	20	13	15	11	7	12	9	6	45	36	19	72
195	2012	507+9	244	2012-06-20	13	21	46	0.178	-0.00680461	M	32	Present	Present	28	0	1	44	98	1.94	0.218943	23	52	1.762	1	1	52	118	3.088	0.378195	31	72	2.91					27	20	13	15	11	7	12	9	6	45	36	19	72
196	2012	508+9	244	2012-06-20	13	21	48	0.173	-0.0118046	F	32	Present	Present	28	0	0								0													27	20	13	15	11	7	12	9	6	45	36	19	72
188	2012	407+9	70+10+6+3	2012-06-07	0	22	46	0.209	0.00690802	F	32	Present	Present	28	0	1	51	112	2.41	0.064834	29	66	2.201	1	1	56	122	3.448	0.244166	34	76	3.239	2013-07-16	196	1	6	27	20	13	15	11	7	12	9	6	45	36	19	72
198	2012	512+9	244	2012-06-20	13	21	45	0.175	-0.00980461	F	32	Present	Present	28	0	1	42	87	1.51	-0.0327396	21	42	1.335	0	0												27	20	13	15	11	7	12	9	6	45	36	19	72
187	2012	405+9	70+10+6+3	2012-06-07	0	23	46	0.201	-0.0183793	F	32	Present	Present	28	0	1	52	119	2.47	0.0356755	29	73	2.269	0	0												27	20	13	15	11	7	12	9	6	45	36	19	72
205	2012	568+9	0+282	2012-06-27	20	21	45	0.195	0.0101954	M	32	Present	Present	28	0	0								0													27	20	13	15	11	7	12	9	6	45	36	19	72
201	2012	533+9	244	2012-06-20	13	20	43	0.169	0.00148276	M	32	Present	Present	28	0	1	43	91	1.55	-0.0818981	23	48	1.381	0	0												27	20	13	15	11	7	12	9	6	45	36	19	72
163	2012	0+438	0+910	2012-06-16	9	23	48	0.191	-0.0283793	F	32	Present	Present	28	0	1	44	99	1.61	-0.111057	21	51	1.419	0	0												27	20	13	15	11	7	12	9	6	45	36	19	72
204	2012	567+9	0+282	2012-06-27	20	22	46	0.21	0.00790802	M	32	Present	Present	28	0	1	42	95	1.57	0.0272604	20	49	1.36	0	0												27	20	13	15	11	7	12	9	6	45	36	19	72
206	2012	573+9	0+282	2012-06-27	20	22	45	0.194	-0.00809198	M	32	Present	Present	28	0	1	39	83	1.32	0.0447359	17	38	1.126	0	0												27	20	13	15	11	7	12	9	6	45	36	19	72
200	2012	532+9	244	2012-06-20	13	20	42	0.171	0.00348276	M	32	Present	Present	28	0	1	36	73	1.12	0.112211	16	31	0.949	0	0												27	20	13	15	11	7	12	9	6	45	36	19	72
171	2012	0+567	1108	2012-06-28	21	22	47	0.205	0.00290802	M	32	Present	Present	28	0	1	45	102	1.65	-0.160215	23	55	1.445	1	1	54	119	2.947	-0.00981975	32	72	2.742					27	20	13	15	11	7	12	9	6	45	36	19	72
172	2012	0+568	1108	2012-06-28	21	23	47	0.196	-0.0233793	F	32	Present	Present	28	0	1	46	100	1.58	-0.319374	23	53	1.384	1	1	52	126	2.72	0.0101947	29	79	2.524					27	20	13	15	11	7	12	9	6	45	36	19	72
173	2012	0+570	1108	2012-06-28	21	22	47	0.186	-0.016092	F	32	Present	Present	28	0	1	44	94	1.38	-0.341057	22	47	1.194	1	1	58	121	3.052	-0.398849	36	74	2.866	2013-07-31	211	1	5	27	20	13	15	11	7	12	9	6	45	36	19	72
170	2012	0+456	100	2012-06-17	10	25	51	0.235	-0.0189541	F	32	Present	Present	28	0	1	50	102	2.11	-0.146007	25	51	1.875	0	0												27	20	13	15	11	7	12	9	6	45	36	19	72
162	2012	0+437	0+910	2012-06-16	9	21	45	0.185	0.000195391	M	32	Present	Present	28	0	1	45	106	2.07	0.259785	24	61	1.885	1	1	53	89	2.772	-0.0613125	32	44	2.587					27	20	13	15	11	7	12	9	6	45	36	19	72
176	2012	0+573	1108	2012-06-28	21	22	48	0.203	0.000908025	M	32	Present	Present	28	0	1	41	86	1.13	-0.323581	19	38	0.927	0	0												27	20	13	15	11	7	12	9	6	45	36	19	72
177	2012	0+574	1108	2012-06-28	21	22	48	0.21	0.00790802	M	32	Present	Present	28	0	1	43	101	1.66	0.0281019	21	53	1.45	1	1	53	129	3.091	0.257687	31	81	2.881					27	20	13	15	11	7	12	9	6	45	36	19	72
178	2012	0+575	1108	2012-06-28	21	22	47	0.205	0.00290802	M	32	Present	Present	28	0	1	43	97	1.44	-0.191898	21	50	1.235	1	1	45	73	1.469	-0.376255	23	26	1.264					27	20	13	15	11	7	12	9	6	45	36	19	72
179	2012	0+576	1108	2012-06-28	21	23	47	0.192	-0.0273793	F	32	Present	Present	28	0	1	44	98	1.55	-0.171057	21	51	1.358	0	0												27	20	13	15	11	7	12	9	6	45	36	19	72
180	2012	0+577	1108	2012-06-28	21	22	48	0.201	-0.00109198	M	32	Present	Present	28	0	1	43	94	1.59	-0.0418981	21	46	1.389	0	0												27	20	13	15	11	7	12	9	6	45	36	19	72
199	2013	626+9	3370+9	17-juin	2	20	39	0.141	-0.0265172	M	32	Warm	Warm	38	0	1	50	110	2.12	-0.136007	30	71	1.979	0	0												26	18	12	15	12	7	11	6	5	34	15	8	60
156	2013	0+812	79	07-juil	22	21	42	0.166	-0.0188046	M	32	Warm	Warm	38	0	1	41	83	1.51	0.0564189	20	41	1.344	0	0												26	18	12	15	12	7	11	6	5	34	15	8	60
155	2013	0+811	138+9	06-juil	21	20	41	0.174	0.00648276	M	32	Warm	Warm	38	0	1	45	105	1.92	0.109785	25	64	1.746	0	0												26	18	12	15	12	7	11	6	5	34	15	8	60
208	2013	637+9	3312+9	18-juin	3	20	39	0.144	-0.0235172	F	32	Warm	Warm	38	0	0								0													26	18	12	15	12	7	11	6	5	34	15	8	60
319	2013	777+9	6	02-juil	17	23	48	0.204	-0.0153793	F	32	Warm	Warm	38	0	1	52	118	2.63	0.195676	29	70	2.426	1	1	58	122	3.4	-0.0508487	35	74	3.196	2014-07-05	185	1	3	26	18	12	15	12	7	11	6	5	34	15	8	60
373	2013	845+9	0+586	21-juil	36	21	43	0.182	-0.00280461	F	32	Warm	Warm	38	0	1	40	89	1.25	-0.114423	19	46	1.068	1	1	54	101	3.08	0.12318	33	58	2.898			0		26	18	12	15	12	7	11	6	5	34	15	8	60
157	2013	0+813	79	07-juil	22	19	39	0.136	-0.0142299	M	32	Warm	Warm	38	0	1	32	91	1.28	0.628845	13	52	1.144	1	1	45	88	1.81	-0.0352547	26	49	1.674					26	18	12	15	12	7	11	6	5	34	15	8	60
375	2013	847+9	0+586	21-juil	36	21	44	0.176	-0.00880461	M	32	Warm	Warm	38	0	1	38	89	1.13	-0.0561056	17	45	0.954	0	0												26	18	12	15	12	7	11	6	5	34	15	8	60
163	2013	0+821	319	09-juil	24	22	50	0.226	0.023908	M	32	Warm	Warm	38	0	1	39	96	1.44	0.164736	17	46	1.214	1	1	51	124	2.88	0.293702	29	74	2.654					26	18	12	15	12	7	11	6	5	34	15	8	60
256	2013	698+9	438	23-juin	8	26	51	0.265	-0.00624144	F	32	Warm	Warm	38	0	0								0													26	18	12	15	12	7	11	6	5	34	15	8	60
244	2013	684+9	126	22-juin	7	22	46	0.216	0.013908	F	32	Warm	Warm	38	0	0								0													26	18	12	15	12	7	11	6	5	34	15	8	60
379	2013	853+9	414+9	25-juil	40	22	47	0.19	-0.012092	F	32	Warm	Warm	38	0	1	37	80	1.02	-0.0769472	15	33	0.83	0	0												26	18	12	15	12	7	11	6	5	34	15	8	60
327	2013	787+9	542+9?	04-juil	19	22	45	0.216	0.013908	F	32	Warm	Warm	38	0	0								0													26	18	12	15	12	7	11	6	5	34	15	8	60
207	2013	636+9	3312+9	18-juin	3	20	41	0.183	0.0154828	M	32	Warm	Warm	38	0	0								0													26	18	12	15	12	7	11	6	5	34	15	8	60
382	2013	856+9	414+9	25-juil	40	20	44	0.152	-0.0155172	M	32	Warm	Warm	38	0	0								0													26	18	12	15	12	7	11	6	5	34	15	8	60
317	2013	775+9	6	02-juil	17	22	47	0.209	0.00690802	F	32	Warm	Warm	38	0	0								0													26	18	12	15	12	7	11	6	5	34	15	8	60
103	2013	0+753	376	27-juin	12	21	42	0.18	-0.00480461	M	32	Warm	Warm	38	0	0								0													26	18	12	15	12	7	11	6	5	34	15	8	60
104	2013	0+754	376	27-juin	12	23	43	0.188	-0.0313793	F	32	Warm	Warm	38	0	0								0													26	18	12	15	12	7	11	6	5	34	15	8	60
133	2013	0+786	3103+9	03-juil	18	21	45	0.196	0.0111954	M	32	Warm	Warm	38	0	1	45	106	1.86	0.0497849	24	61	1.664	1	1	61	112	2.57	-1.25137	40	67	2.374					26	18	12	15	12	7	11	6	5	34	15	8	60
267	2013	713+9	3233+9	25-juin	10	20	46	0.196	0.0284828	M	32	Warm	Warm	38	0	0								0													26	18	12	15	12	7	11	6	5	34	15	8	60
242	2013	682+9	126	22-juin	7	23	47	0.217	-0.00237934	F	32	Warm	Warm	38	0	0								0													26	18	12	15	12	7	11	6	5	34	15	8	60
258	2013	702+9	438	23-juin	8	23	52	0.242	0.0226207	M	32	Warm	Warm	38	0	0								0													26	18	12	15	12	7	11	6	5	34	15	8	60
272	2013	718+9	3233+9	25-juin	10	21	44	0.205	0.0201954	M	32	Warm	Warm	38	0	1	49	118	2.48	0.313151	28	74	2.275	1	1	51	116	2.9	0.313702	30	72	2.695					26	18	12	15	12	7	11	6	5	34	15	8	60
322	2013	782+9	6	02-juil	17	22	46	0.199	-0.00309198	F	32	Warm	Warm	38	0	1	54	120	2.73	0.117359	32	74	2.531	0	0												26	18	12	15	12	7	11	6	5	34	15	8	60
329	2013	791+9	542+9?	04-juil	19	23	48	0.227	0.00762066	F	32	Warm	Warm	38	0	1	52	121	2.71	0.275676	29	73	2.483	1	1	55	117	2.7	-0.380327	32	69	2.473			0		26	18	12	15	12	7	11	6	5	34	15	8	60
203	2013	632+9	3217+9	17-juin	2	19	39	0.131	-0.0192299	F	32	Warm	Warm	38	0	0								0													26	18	12	15	12	7	11	6	5	34	15	8	60
323	2013	783+9	6	02-juil	17	23	46	0.2	-0.0193793	F	32	Warm	Warm	38	0	1	52	115	2.48	0.0456755	29	69	2.28	1	1	55	111	3.13	0.049673	32	65	2.93			0		26	18	12	15	12	7	11	6	5	34	15	8	60
205	2013	634+9	3312+9	18-juin	3	20	40	0.15	-0.0175172	F	32	Warm	Warm	38	0	0								0													26	18	12	15	12	7	11	6	5	34	15	8	60
164	2013	0+822	319	09-juil	24	22	48	0.229	0.026908	F	32	Warm	Warm	38	0	0								0													26	18	12	15	12	7	11	6	5	34	15	8	60
46	2013	0+690	3262+9	21-juin	6	23	47	0.202	-0.0173793	F	33	Present	Present	28	0	1	41	87	1.34	-0.113581	18	40	1.138	0	0												26	19	10	15	11	4	11	8	6	37	15	9	63
384	2013	858+9	0+570	31-juil	46	21	46	0.193	0.00819539	M	33	Present	Present	28	0	1	32	71	0.78	0.128845	11	25	0.587	1	1	48	115	2.59	0.374224	27	69	2.397					26	19	10	15	11	4	11	8	6	37	15	9	63
366	2013	836+9	244	18-juil	33	19	42	0.159	0.00877012	M	33	Present	Present	28	0	1	27	62	0.51	0.304638	8	20	0.351	0	0												26	19	10	15	11	4	11	8	6	37	15	9	63
367	2013	837+9	244	18-juil	33	22	44	0.187	-0.015092	F	33	Present	Present	28	0	1	38	83	1.21	0.0238944	16	39	1.023	1	1	59	127	4.273	0.698644	37	83	4.086	2014-07-18	198	1	6	26	19	10	15	11	4	11	8	6	37	15	9	63
368	2013	838+9	244	18-juil	33	19	41	0.162	0.0117701	M	33	Present	Present	28	0	0								0													26	19	10	15	11	4	11	8	6	37	15	9	63
20	2013	0+661	3250+9	19-juin	4	21		0.197	0.0121954	F	33	Present	Present	28	0	1	45	84	1.54	-0.270215	24	57	1.343	1	1	57	95	2.73	-0.597341	36	95	2.533			0		26	19	10	15	11	4	11	8	6	37	15	9	63
21	2013	0+662	3250+9	19-juin	4	21	46	0.189	0.00419539	M	33	Present	Present	28	0	1	47	104	2.04	0.051468	26	58	1.851	1	1	55	115	3.09	0.00967302	34	69	2.901					26	19	10	15	11	4	11	8	6	37	15	9	63
385	2013	861+9	0+570	31-juil	46	22	46	0.2	-0.00209198	F	33	Present	Present	28	0	0								0													26	19	10	15	11	4	11	8	6	37	15	9	63
365	2013	835+9	0+595	16-juil	31	20	41	0.18	0.0124828	M	33	Present	Present	28	0	1	35	80	1.02	0.10137	15	39	0.84	1	1	55	113	2.6	-0.480327	35	72	2.42					26	19	10	15	11	4	11	8	6	37	15	9	63
114	2013	0+765	561+9	29-juin	14	21	41	0.186	0.00119539	F	33	Present	Present	28	0	1	47	100	1.87	-0.118532	26	59	1.684	1	1	57	118	4.263	0.935659	36	77	4.077	2014-07-04	184	1	5	26	19	10	15	11	4	11	8	6	37	15	9	63
303	2013	757+9	3291+9	29-juin	14	22	43	0.194	-0.00809198	M	33	Present	Present	28	0	0								0													26	19	10	15	11	4	11	8	6	37	15	9	63
343	2013	807+9	424	05-juil	20	22	44	0.187	-0.015092	F	33	Present	Present	28	0	0								0													26	19	10	15	11	4	11	8	6	37	15	9	63
158	2013	0+814	79	07-juil	22	20	40	0.15	-0.0175172	M	33	Present	Present	28	0	0								0													26	19	10	15	11	4	11	8	6	37	15	9	63
198	2013	625+9	3370+9	17-juin	2	21	43	0.165	-0.0198046	M	33	Present	Present	28	0	0								0													26	19	10	15	11	4	11	8	6	37	15	9	63
226	2013	662+9	3252+9	20-juin	5	19	36	0.118	-0.0322299	M	33	Present	Present	28	0	0								0													26	19	10	15	11	4	11	8	6	37	15	9	63
387	2013	863+9	0+570	31-juil	46	21	46	0.195	0.0101954	F	33	Present	Present	28	0	0								0													26	19	10	15	11	4	11	8	6	37	15	9	63
162	2013	0+818	319	09-juil	24	23	49	0.241	0.0216207	F	33	Present	Present	28	0	0								0													26	19	10	15	11	4	11	8	6	37	15	9	63
364	2013	834+9	0+595	16-juil	31	20	44	0.18	0.0124828	M	33	Present	Present	28	0	1	37	88	1.18	0.0830528	17	44	1	0	0												26	19	10	15	11	4	11	8	6	37	15	9	63
342	2013	806+9	424	05-juil	20	21	41	0.165	-0.0198046	F	33	Present	Present	28	0	0								0													26	19	10	15	11	4	11	8	6	37	15	9	63
165	2013	0+823	319	09-juil	24	23	50	0.218	-0.00137934	M	33	Present	Present	28	0	0								0													26	19	10	15	11	4	11	8	6	37	15	9	63
328	2013	788+9	542+9?	04-juil	19	23	48	0.22	0.000620658	F	33	Present	Present	28	0	1	43	95	1.68	0.0481019	20	47	1.46	1	1	57	119	3.26	-0.0673414	34	71	3.04	2014-07-14	194	1	4	26	19	10	15	11	4	11	8	6	37	15	9	63
216	2013	647+9	3254+9	18-juin	3	23	46	0.211	-0.00837934	F	33	Present	Present	28	0	1	49	110	2.26	0.093151	26	64	2.049	1	1	60	121	3.56	-0.137863	37	75	3.349	2014-06-29	179	1	5	26	19	10	15	11	4	11	8	6	37	15	9	63
238	2013	676+9	3268+9	21-juin	6	20	38	0.153	-0.0145172	F	33	Present	Present	28	0	1	33	69	0.76	0.0196868	13	31	0.607	1	1	46	99	1.88	-0.0887619	26	61	1.727			0		26	19	10	15	11	4	11	8	6	37	15	9	63
45	2013	0+688	3262+9	21-juin	6	23	52	0.233	0.0136207	F	33	Present	Present	28	0	0								0													26	19	10	15	11	4	11	8	6	37	15	9	63
326	2013	786+9	542+9?	04-juil	19	23	48	0.217	-0.00237934	F	33	Present	Present	28	0	1	44	97	1.73	0.00894343	21	49	1.513	0	0												26	19	10	15	11	4	11	8	6	37	15	9	63
94	2013	0+743	115	27-juin	12	21	44	0.185	0.000195391	M	33	Present	Present	28	0	0								0													26	19	10	15	11	4	11	8	6	37	15	9	63
24	2013	0+665	3250+9	19-juin	4	21	44	0.19	0.00519539	F	33	Present	Present	28	0	0								0													26	19	10	15	11	4	11	8	6	37	15	9	63
307	2013	763+9	3291+9	29-juin	14	21	43	0.199	0.0141954	M	33	Present	Present	28	0	0								0													26	19	10	15	11	4	11	8	6	37	15	9	63
200	2013	627+9	3370+9	17-juin	2	18	38	0.123	-0.00994251	M	33	Present	Present	28	0	0								0													26	19	10	15	11	4	11	8	6	37	15	9	63
257	2013	701+9	438	23-juin	8	22	49	0.242	0.039908	F	33	Present	Present	28	0	0								0													26	19	10	15	11	4	11	8	6	37	15	9	63
96	2013	0+745	115	27-juin	12	22	44	0.189	-0.013092	F	33	Present	Present	28	0	0								0													26	19	10	15	11	4	11	8	6	37	15	9	63
43	2013	0+686	3262+9	21-juin	6	21	47	0.209	0.0241954	M	33	Present	Present	28	0	0								0													26	19	10	15	11	4	11	8	6	37	15	9	63
98	2013	0+747	115	27-juin	12	22	46	0.205	0.00290802	F	33	Present	Present	28	0	0								0													26	19	10	15	11	4	11	8	6	37	15	9	63
113	2013	0+764	561+9	29-juin	14	20	43	0.19	0.0224828	M	33	Present	Present	28	0	1	44	108	2.05	0.328943	24	65	1.86														26	19	10	15	11	4	11	8	6	37	15	9	63
245	2012	531+9	259	2012-06-21	14	21	46	0.215	0.0301954	M	37	Warm	Warm	38	0	1	45	95	1.83	0.0197849	24	49	1.615	1	1	53	109	3.095	0.261687	32	63	2.88					27	20	2	15	11	1	11	9	1	43	18	3	70
217	2012	0+557	304	2012-06-26	19	23	48	0.193	-0.0263793	F	37	Warm	Warm	38	0	0								0													27	20	2	15	11	1	11	9	1	43	18	3	70
218	2012	0+558	304	2012-06-26	19	22	47	0.185	-0.017092	M	37	Warm	Warm	38	0	0								0													27	20	2	15	11	1	11	9	1	43	18	3	70
219	2012	0+560	304	2012-06-26	19	22	47	0.204	0.00190802	F	37	Warm	Warm	38	0	0								0													27	20	2	15	11	1	11	9	1	43	18	3	70
248	2012	614+9	92	2012-07-10	33	22	44	0.205	0.00290802	M	37	Warm	Warm	38	0	1	38	90	1.18	-0.00610564	16	46	0.975	0	0												27	20	2	15	11	1	11	9	1	43	18	3	70
249	2012	615+9	92	2012-07-10	33	22	46	0.206	0.00390802	M	37	Warm	Warm	38	0	1	44	98	1.58	-0.141057	22	52	1.374	0	0												27	20	2	15	11	1	11	9	1	43	18	3	70
209	2012	0+417	18	2012-06-11	4	21	42	0.224	0.0391954	F	37	Warm	Warm	38	0	0								0													27	20	2	15	11	1	11	9	1	43	18	3	70
210	2012	0+418	18	2012-06-11	4	18	40	0.185	0.0520575	M	37	Warm	Warm	38	0	0								0													27	20	2	15	11	1	11	9	1	43	18	3	70
211	2012	0+451	0+223	2012-06-17	10	21	44	0.192	0.00719539	F	37	Warm	Warm	38	0	0								0													27	20	2	15	11	1	11	9	1	43	18	3	70
212	2012	0+452	0+223	2012-06-17	10	22	44	0.201	-0.00109198	M	37	Warm	Warm	38	0	1	51	110	2.77	0.424834	29	66	2.569	0	0												27	20	2	15	11	1	11	9	1	43	18	3	70
213	2012	0+453	0+223	2012-06-17	10	23	45	0.193	-0.0263793	F	37	Warm	Warm	38	0	1	49	100	1.92	-0.246849	26	55	1.727	0	0												27	20	2	15	11	1	11	9	1	43	18	3	70
214	2012	0+454	0+223	2012-06-17	10	22	44	0.187	-0.015092	M	37	Warm	Warm	38	0	0								0													27	20	2	15	11	1	11	9	1	43	18	3	70
215	2012	0+555	304	2012-06-26	19	22	47	0.195	-0.00709198	M	37	Warm	Warm	38	0	0								0													27	20	2	15	11	1	11	9	1	43	18	3	70
216	2012	0+556	304	2012-06-26	19	21	46	0.206	0.0211954	M	37	Warm	Warm	38	0	1	45	93	1.6	-0.210215	24	47	1.394	0	0												27	20	2	15	11	1	11	9	1	43	18	3	70
230	2012	433+9	8	2012-06-15	8	22	49	0.253	0.050908	F	37	Warm	Warm	38	0	1	48	105	2.03	-0.0476905	26	56	1.777	0	0												27	20	2	15	11	1	11	9	1	43	18	3	70
231	2012	434+9	8	2012-06-15	8	23	49	0.245	0.0256207	F	37	Warm	Warm	38	0	0								0													27	20	2	15	11	1	11	9	1	43	18	3	70
232	2012	435+9	8	2012-06-15	8	23	51	0.267	0.0476207	M	37	Warm	Warm	38	0	0								0													27	20	2	15	11	1	11	9	1	43	18	3	70
233	2012	436+9	8	2012-06-15	8	23	49	0.244	0.0246207	F	37	Warm	Warm	38	0	1	53	103	2.25	-0.273483	30	54	2.006	1	1	63	114	4.265	0.196615	40	65	4.021	2013-07-13	193	1	3	27	20	2	15	11	1	11	9	1	43	18	3	70
234	2012	486+9	277	2012-06-18	11	22	47	0.212	0.00990802	M	37	Warm	Warm	38	0	1	47	108	2.12	0.131468	25	61	1.908	0	0												27	20	2	15	11	1	11	9	1	43	18	3	70
235	2012	487+9	277	2012-06-18	11	23	47	0.2	-0.0193793	M	37	Warm	Warm	38	0	1	45	95	1.81	-0.000215057	22	48	1.61	0	0												27	20	2	15	11	1	11	9	1	43	18	3	70
236	2012	488+9	277	2012-06-18	11	22	47	0.218	0.015908	F	37	Warm	Warm	38	0	1	48	104	2.14	0.0623095	26	57	1.922	0	0												27	20	2	15	11	1	11	9	1	43	18	3	70
237	2012	491+9	277	2012-06-18	11	22	46	0.192	-0.010092	F	37	Warm	Warm	38	0	1	47	102	1.71	-0.278532	25	56	1.518	0	0												27	20	2	15	11	1	11	9	1	43	18	3	70
238	2012	492+9	277	2012-06-18	11	22	46	0.213	0.010908	M	37	Warm	Warm	38	0	1	37	63	0.52	-0.576947	15	17	0.307	0	0												27	20	2	15	11	1	11	9	1	43	18	3	70
239	2012	493+9	277	2012-06-18	11	22	46	0.212	0.00990802	M	37	Warm	Warm	38	0	0								0													27	20	2	15	11	1	11	9	1	43	18	3	70
240	2012	524+9	259	2012-06-21	14	23	48	0.23	0.0106207	M	37	Warm	Warm	38	0	1	45	98	1.72	-0.0902151	22	50	1.49	0	0												27	20	2	15	11	1	11	9	1	43	18	3	70
241	2012	525+9	259	2012-06-21	14	23	48	0.22	0.000620658	M	37	Warm	Warm	38	0	1	45	100	1.77	-0.0402151	22	52	1.55	0	0												27	20	2	15	11	1	11	9	1	43	18	3	70
242	2012	526+9	259	2012-06-21	14	21	41	0.16	-0.0248046	F	37	Warm	Warm	38	0	1	41	87	1.31	-0.143581	20	46	1.15	0	0												27	20	2	15	11	1	11	9	1	43	18	3	70
243	2012	527+9	259	2012-06-21	14	22	46	0.22	0.017908	F	37	Warm	Warm	38	0	0								0													27	20	2	15	11	1	11	9	1	43	18	3	70
244	2012	528+9	259	2012-06-21	14	21	46	0.207	0.0221954	M	37	Warm	Warm	38	0	0								0													27	20	2	15	11	1	11	9	1	43	18	3	70
246	2012	612+9	92	2012-07-10	33	21	45	0.207	0.0221954	M	37	Warm	Warm	38	0	0								0													27	20	2	15	11	1	11	9	1	43	18	3	70
247	2012	613+9	92	2012-07-10	33	22	45	0.203	0.000908025	F	37	Warm	Warm	38	0	0								0													27	20	2	15	11	1	11	9	1	43	18	3	70
207	2012	0+415	18	2012-06-11	4	21	45	0.225	0.0401954	M	37	Warm	Warm	38	0	0								0													27	20	2	15	11	1	11	9	1	43	18	3	70
208	2012	0+416	18	2012-06-11	4	22	49	0.258	0.055908	M	37	Warm	Warm	38	0	0								0													27	20	2	15	11	1	11	9	1	43	18	3	70
222	2012	0+590	220	2012-06-29	22	22	46	0.186	-0.016092	F	37	Warm	Warm	38	0	1	45	90	1.5	-0.310215	23	44	1.314	0	0												27	20	2	15	11	1	11	9	1	43	18	3	70
223	2012	0+591	220	2012-06-29	22	22	47	0.203	0.000908025	F	37	Warm	Warm	38	0	1	45	102	1.62	-0.190215	23	55	1.417	1	1	53	89	2.941	0.107687	31	42	2.738			0		27	20	2	15	11	1	11	9	1	43	18	3	70
224	2012	0+592	220	2012-06-29	22	23	47	0.2	-0.0193793	F	37	Warm	Warm	38	0	0								0													27	20	2	15	11	1	11	9	1	43	18	3	70
220	2012	0+587	220	2012-06-29	22	21	46	0.189	0.00419539	M	37	Warm	Warm	38	0	0								0													27	20	2	15	11	1	11	9	1	43	18	3	70
221	2012	0+588	220	2012-06-29	22	22	49	0.203	0.000908025	M	37	Warm	Warm	38	0	0								0													27	20	2	15	11	1	11	9	1	43	18	3	70
227	2012	0+602	220	2012-06-29	22	22	46	0.178	-0.024092	F	37	Warm	Warm	38	0	0								0													27	20	2	15	11	1	11	9	1	43	18	3	70
228	2012	431+9	8	2012-06-15	8	23	51	0.279	0.0596207	F	37	Warm	Warm	38	0	0								0													27	20	2	15	11	1	11	9	1	43	18	3	70
229	2012	432+9	8	2012-06-15	8	23	49	0.25	0.0306207	F	37	Warm	Warm	38	0	0								0													27	20	2	15	11	1	11	9	1	43	18	3	70
225	2012	0+593	220	2012-06-29	22	21	46	0.193	0.00819539	M	37	Warm	Warm	38	0	0								0													27	20	2	15	11	1	11	9	1	43	18	3	70
226	2012	0+594	220	2012-06-29	22	22	47	0.189	-0.013092	F	37	Warm	Warm	38	0	0								0													27	20	2	15	11	1	11	9	1	43	18	3	70
260	2012	0+604	40	2012-07-02	25	22	47	0.193	-0.00909198	M	38	Intermediate	Warm	34	0	0								0													27	24	14	16	14	6	11	10	8	40	14	9	67
257	2012	0+538	138+9	2012-06-24	17	22	44	0.17	-0.032092	F	38	Intermediate	Warm	34	0	0								0													27	24	14	16	14	6	11	10	8	40	14	9	67
254	2012	0+450	80B	2012-06-17	10	23	46	0.222	0.00262066	F	38	Intermediate	Warm	34	0	1	45	56	1.47	-0.340215	22	10	1.248	0	0												27	24	14	16	14	6	11	10	8	40	14	9	67
259	2012	0+603	40	2012-07-02	25	22	47	0.187	-0.015092	M	38	Intermediate	Warm	34	0	0								0													27	24	14	16	14	6	11	10	8	40	14	9	67
251	2012	0+446	80B	2012-06-17	10	24	47	0.222	-0.0146667	M	38	Intermediate	Warm	34	0	0								0													27	24	14	16	14	6	11	10	8	40	14	9	67
252	2012	0+447	80B	2012-06-17	10	24	45	0.216	-0.0206667	M	38	Intermediate	Warm	34	0	0								0													27	24	14	16	14	6	11	10	8	40	14	9	67
250	2012	0+445	80B	2012-06-17	10	22	46	0.215	0.012908	M	38	Intermediate	Warm	34	0	1								1	1	54	104	3.093	0.13618	32	58	2.878					27	24	14	16	14	6	11	10	8	40	14	9	67
253	2012	0+448	80B	2012-06-17	10	22	48	0.204	0.00190802	M	38	Intermediate	Warm	34	0	0								0													27	24	14	16	14	6	11	10	8	40	14	9	67
269	2012	422+9	77B	2012-06-12	5	18	37	0.132	-0.00094251	M	38	Intermediate	Warm	34	0	0								0													27	24	14	16	14	6	11	10	8	40	14	9	67
270	2012	423+9	77B	2012-06-12	5	19	41	0.176	0.0257701	F	38	Intermediate	Warm	34	0	0								0													27	24	14	16	14	6	11	10	8	40	14	9	67
272	2012	425+9	77B	2012-06-12	5	21	43	0.175	-0.00980461	M	38	Intermediate	Warm	34	0	0								0													27	24	14	16	14	6	11	10	8	40	14	9	67
273	2012	471+9	938	2012-06-17	10	22	45	0.197	-0.00509198	F	38	Intermediate	Warm	34	0	0								0													27	24	14	16	14	6	11	10	8	40	14	9	67
275	2012	473+9	938	2012-06-17	10	22	48	0.213	0.010908	M	38	Intermediate	Warm	34	0	1	49	103	2.49	0.323151	27	55	2.277	1	1	53	116	2.93	0.0966875	31	68	2.717					27	24	14	16	14	6	11	10	8	40	14	9	67
276	2012	474+9	938	2012-06-17	10	22	48	0.201	-0.00109198	M	38	Intermediate	Warm	34	0	1	51	117	2.66	0.314834	29	69	2.459	1	1	52	129	3.111	0.401195	30	81	2.91					27	24	14	16	14	6	11	10	8	40	14	9	67
277	2012	475+9	938	2012-06-17	10	23	50	0.21	-0.00937934	M	38	Intermediate	Warm	34	0	0								0													27	24	14	16	14	6	11	10	8	40	14	9	67
278	2012	477+9	122	2012-06-18	11	22	47	0.233	0.030908	M	38	Intermediate	Warm	34	0	0								0													27	24	14	16	14	6	11	10	8	40	14	9	67
279	2012	478+9	122	2012-06-18	11	22	46	0.235	0.032908	M	38	Intermediate	Warm	34	0	0								0													27	24	14	16	14	6	11	10	8	40	14	9	67
281	2012	482+9	122	2012-06-18	11	22	47	0.224	0.021908	M	38	Intermediate	Warm	34	0	0								0													27	24	14	16	14	6	11	10	8	40	14	9	67
282	2012	483+9	122	2012-06-18	11	24	50	0.222	-0.0146667	F	38	Intermediate	Warm	34	0	1	46	65	1.5	-0.399374	22	15	1.278	0	0												27	24	14	16	14	6	11	10	8	40	14	9	67
283	2012	484+9	122	2012-06-18	11	22	45	0.201	-0.00109198	M	38	Intermediate	Warm	34	0	0								0													27	24	14	16	14	6	11	10	8	40	14	9	67
285	2012	523+9	938	2012-06-17	10	23	50	0.192	-0.0273793	M	38	Intermediate	Warm	34	0	0	50	120	2.26	0.00399251	27	40	2.068	1	1	56	129	3.687	0.483166	33	79	3.495					27	24	14	16	14	6	11	10	8	40	14	9	67
286	2012	574+9	149	2012-06-27	20	22	46	0.197	-0.00509198	M	38	Intermediate	Warm	34	0	0								0													27	24	14	16	14	6	11	10	8	40	14	9	67
287	2012	575+9	149	2012-06-27	20	24	47	0.206	-0.0306667	F	38	Intermediate	Warm	34	0	0								0													27	24	14	16	14	6	11	10	8	40	14	9	67
264	2012	0+620	697+9	2012-07-08	31	22	46	0.207	0.00490802	F	38	Intermediate	Warm	34	0	1	42	66	1.15	-0.39274	20	20	0.943	0	0												27	24	14	16	14	6	11	10	8	40	14	9	67
261	2012	0+605	40	2012-07-02	25	21	45	0.17	-0.0148046	M	38	Intermediate	Warm	34	0	1	45	97	1.8	-0.0102151	24	52	1.63	1	1	54	118	3.256	0.29918	33	73	3.086					27	24	14	16	14	6	11	10	8	40	14	9	67
262	2012	0+606	40	2012-07-02	25	21	44	0.188	0.00319539	F	38	Intermediate	Warm	34	0	0								0													27	24	14	16	14	6	11	10	8	40	14	9	67
267	2012	0+623	697+9	2012-07-08	31	21	44	0.189	0.00419539	F	38	Intermediate	Warm	34	0	1	42	91	1.48	-0.0627396	21	47	1.291	0	0												27	24	14	16	14	6	11	10	8	40	14	9	67
268	2012	421+9	77B	2012-06-12	5	18	36	0.125	-0.00794251	F	38	Intermediate	Warm	34	0	0								0													27	24	14	16	14	6	11	10	8	40	14	9	67
265	2012	0+621	697+9	2012-07-08	31	21	43	0.192	0.00719539	M	38	Intermediate	Warm	34	0	0								0													27	24	14	16	14	6	11	10	8	40	14	9	67
266	2012	0+622	697+9	2012-07-08	31	21	44	0.195	0.0101954	M	38	Intermediate	Warm	34	0	0								0													27	24	14	16	14	6	11	10	8	40	14	9	67
48	2013	0+692	0+92	22-juin	7	23	49	0.233	0.0136207	F	38	Warm	Warm	38	0	0								0													25	17	13	14	10	8	11	7	5	35	20	7	60
349	2013	815+9	174	07-juil	22	20	39	0.156	-0.0115172	M	38	Warm	Warm	38	0	1	34	81	1.03	0.200528	14	42	0.874	0	0												25	17	13	14	10	8	11	7	5	35	20	7	60
288	2013	738+9	322	27-juin	12	21	47	0.217	0.0321954	M	38	Warm	Warm	38	0	0								0													25	17	13	14	10	8	11	7	5	35	20	7	60
70	2013	0+716	470	24-juin	9	22	47	0.193	-0.00909198	F	38	Warm	Warm	38	0	1	39	88	1.26	-0.0152641	17	41	1.067	0	0												25	17	13	14	10	8	11	7	5	35	20	7	60
67	2013	0+713	470	24-juin	9	24	48	0.195	-0.0416667	F	38	Warm	Warm	38	0	1	43	95	1.67	0.0381019	19	47	1.475	0	0												25	17	13	14	10	8	11	7	5	35	20	7	60
369	2013	841+9	244	18-juil	33	20	44	0.18	0.0124828	M	38	Warm	Warm	38	0	1	37	85	1.18	0.0830528	17	41	1	1	1	51	115	2.9	0.313702	31	71	2.72					25	17	13	14	10	8	11	7	5	35	20	7	60
167	2013	0+825	0+561	10-juil	25	22	44	0.188	-0.014092	F	38	Warm	Warm	38	0	1	41	92	1.48	0.0264189	19	48	1.292	0	0												25	17	13	14	10	8	11	7	5	35	20	7	60
217	2013	648+9	3254+9	18-juin	3	23	47	0.239	0.0196207	M	38	Warm	Warm	38	0	0								0													25	17	13	14	10	8	11	7	5	35	20	7	60
47	2013	0+691	0+92	22-juin	7	24	50	0.24	0.00333329	F	38	Warm	Warm	38	0	0								0													25	17	13	14	10	8	11	7	5	35	20	7	60
142	2013	0+796	3213+9	04-juil	19	21	45	0.188	0.00319539	F	38	Warm	Warm	38	0	1	39	84	1.2	-0.0752641	18	39	1.012	0	0												25	17	13	14	10	8	11	7	5	35	20	7	60
176	2013	0+835	inconnue_657+9+100ou611+9	20-juil	35	19	35	0.158	0.00777012	M	38	Warm	Warm	38	0	0								0													25	17	13	14	10	8	11	7	5	35	20	7	60
69	2013	0+715	470	24-juin	9	22	47	0.208	0.00590802	M	38	Warm	Warm	38	0	1	39	92	1.34	0.0647359	17	45	1.132	0	0												25	17	13	14	10	8	11	7	5	35	20	7	60
166	2013	0+824	0+561	10-juil	25	23	46	0.213	-0.00637934	F	38	Warm	Warm	38	0	0								0													25	17	13	14	10	8	11	7	5	35	20	7	60
371	2013	843+9	244	18-juil	33	16	37	0.126	0.0276322	M	38	Warm	Warm	38	0	1	29	63	0.66	0.276321	13	26	0.534	0	0												25	17	13	14	10	8	11	7	5	35	20	7	60
300	2013	754+9	11	27-juin	12	21	44	0.176	-0.00880461	M	38	Warm	Warm	38	0	0								0													25	17	13	14	10	8	11	7	5	35	20	7	60
22	2013	0+663	3250+9	19-juin	4	21	47	0.199	0.0141954	M	38	Warm	Warm	38	0	0								0													25	17	13	14	10	8	11	7	5	35	20	7	60
51	2013	0+695	0+92	22-juin	7	23	47	0.221	0.00162066	M	38	Warm	Warm	38	0	1	43	102	1.75	0.118102	20	55	1.529	1	1	50	112	3.48	1.01721	27	65	3.259					25	17	13	14	10	8	11	7	5	35	20	7	60
66	2013	0+712	470	24-juin	9	22	46	0.2	-0.00209198	F	38	Warm	Warm	38	0	1	44	77	1.47	-0.251057	22	31	1.27	1	1	58	107	2.93	-0.520849	36	61	2.73	2014-07-11	191	1	2	25	17	13	14	10	8	11	7	5	35	20	7	60
293	2013	745+9	11	27-juin	12	21	44	0.189	0.00419539	F	38	Warm	Warm	38	0	0								0													25	17	13	14	10	8	11	7	5	35	20	7	60
23	2013	0+664	3250+9	19-juin	4	21	46	0.203	0.0181954	F	38	Warm	Warm	38	0	0								0													25	17	13	14	10	8	11	7	5	35	20	7	60
218	2013	652+9	3254+9	18-juin	3	22	47	0.208	0.00590802	F	38	Warm	Warm	38	0	1	46	100	1.73	-0.169374	24	53	1.522	0	0												25	17	13	14	10	8	11	7	5	35	20	7	60
370	2013	842+9	244	18-juil	33	21	45	0.177	-0.00780461	F	38	Warm	Warm	38	0	1	33	67	0.75	0.00968679	12	22	0.573	1	1	48	89	1.96	-0.255776	27	44	1.783			0		25	17	13	14	10	8	11	7	5	35	20	7	60
215	2013	646+9	3254+9	18-juin	3	21	45	0.208	0.0231954	M	38	Warm	Warm	38	0	0								0													25	17	13	14	10	8	11	7	5	35	20	7	60
19	2013	0+660	3250+9	19-juin	4	21	46	0.193	0.00819539	M	38	Warm	Warm	38	0	1	41	101	1.48	0.0264189	20	55	1.287	1	1	53	124	3.29	0.456687	32	78	3.097					25	17	13	14	10	8	11	7	5	35	20	7	60
301	2013	755+9	80A	28-juin	13	21	45	0.181	-0.00380461	M	38	Warm	Warm	38	0	1	40	100	1.39	0.0255774	19	55	1.209	0	0												25	17	13	14	10	8	11	7	5	35	20	7	60
299	2013	753+9	11	27-juin	12	22	45	0.172	-0.030092	F	38	Warm	Warm	38	0	0								0													25	17	13	14	10	8	11	7	5	35	20	7	60
290	2013	742+9	322	27-juin	12	23	48	0.219	-0.000379342	F	38	Warm	Warm	38	0	0								0													25	17	13	14	10	8	11	7	5	35	20	7	60
37	2013	0+680	3251+9	21-juin	6	16	29	0.094	-0.00436778	F	38	Warm	Warm	38	0	1	33	65	0.77	0.0296868	17	36	0.676	1	1	52	102	2.49	-0.219805	36	73	2.396	2014-07-13	193	1	1	25	17	13	14	10	8	11	7	5	35	20	7	60
363	2013	833+9	0+595	16-juil	31	23	48	0.184	-0.0353793	F	38	Warm	Warm	38	0	1	39	88	1.1	-0.175264	16	40	0.916	0	0												25	17	13	14	10	8	11	7	5	35	20	7	60
38	2013	0+681	3251+9	21-juin	6	17	31	0.107	-0.00865514	M	38	Warm	Warm	38	0	0								0													25	17	13	14	10	8	11	7	5	35	20	7	60
348	2013	814+9	174	07-juil	22	20	43	0.174	0.00648276	M	38	Warm	Warm	38	0	0								0													25	17	13	14	10	8	11	7	5	35	20	7	60
324	2013	784+9	80B	04-juil	19	21	42	0.18	-0.00480461	F	38	Warm	Warm	38	0	1	37	78	0.95	-0.146947	16	36	0.77	0	0												25	17	13	14	10	8	11	7	5	35	20	7	60
296	2013	748+9	11	27-juin	12	21	44	0.188	0.00319539	M	38	Warm	Warm	38	0	1	44	105	1.74	0.0189434	23	61	1.552	0	0												25	17	13	14	10	8	11	7	5	35	20	7	60
292	2012	0+524	450	2012-06-22	15	23	49	0.25	0.0306207	M	41	Present	Present	28	0	0								0													26	20	11	15	11	5	11	9	6	36	7	2	62
293	2012	0+525	450	2012-06-22	15	23	50	0.26	0.0406207	M	41	Present	Present	28	0	0								0													26	20	11	15	11	5	11	9	6	36	7	2	62
290	2012	0+522	450	2012-06-22	15	24	52	0.263	0.0263333	F	41	Present	Present	28	0	1	48	92	1.65	-0.427691	24	40	1.387	1	1	53	79	2.051	-0.782313	29	27	1.788			0		26	20	11	15	11	5	11	9	6	36	7	2	62
291	2012	0+523	450	2012-06-22	15	24	53	0.258	0.0213333	F	41	Present	Present	28	0	0								0													26	20	11	15	11	5	11	9	6	36	7	2	62
304	2012	463+9	470	2012-06-17	10	22	45	0.191	-0.011092	F	41	Present	Present	28	0	0								0													26	20	11	15	11	5	11	9	6	36	7	2	62
305	2012	464+9	470	2012-06-17	10	20	44	0.196	0.0284828	M	41	Present	Present	28	0	0								0													26	20	11	15	11	5	11	9	6	36	7	2	62
306	2012	465+9	470	2012-06-17	10	23	46	0.192	-0.0273793	F	41	Present	Present	28	0	0								0													26	20	11	15	11	5	11	9	6	36	7	2	62
295	2012	0+527	450	2012-06-22	15	22	51	0.25	0.047908	M	41	Present	Present	28	0	1	43	96	1.52	-0.111898	21	45	1.27	0	0												26	20	11	15	11	5	11	9	6	36	7	2	62
296	2012	0+528	450	2012-06-22	15	22	49	0.238	0.035908	M	41	Present	Present	28	0	0								0													26	20	11	15	11	5	11	9	6	36	7	2	62
297	2012	415+9	201	2012-06-11	4	20	43	0.218	0.0504828	M	41	Present	Present	28	0	0								0													26	20	11	15	11	5	11	9	6	36	7	2	62
298	2012	416+9	201	2012-06-11	4	18	37	0.144	0.0110575	M	41	Present	Present	28	0	0								0													26	20	11	15	11	5	11	9	6	36	7	2	62
299	2012	417+9	201	2012-06-11	4	21	45	0.206	0.0211954	F	41	Present	Present	28	0	0								0													26	20	11	15	11	5	11	9	6	36	7	2	62
300	2012	457+9	96	2012-06-17	10	24	49	0.238	0.00133329	M	41	Present	Present	28	0	0								0													26	20	11	15	11	5	11	9	6	36	7	2	62
301	2012	458+9	96	2012-06-17	10	24	47	0.23	-0.00666671	F	41	Present	Present	28	0	1	45	94	1.54	-0.270215	21	47	1.31	0	0												26	20	11	15	11	5	11	9	6	36	7	2	62
302	2012	461+9	96	2012-06-17	10	24	52	0.274	0.0373333	F	41	Present	Present	28	0	0								0													26	20	11	15	11	5	11	9	6	36	7	2	62
303	2012	462+9	470	2012-06-17	10	22	47	0.198	-0.00409198	F	41	Present	Present	28	0	0								0													26	20	11	15	11	5	11	9	6	36	7	2	62
317	2012	545+9	AF_105	2012-06-23	16	22	45	0.186	-0.016092	F	41	Present	Present	28	0	0								0													26	20	11	15	11	5	11	9	6	36	7	2	62
318	2012	546+9	AF_105	2012-06-23	16	22	45	0.183	-0.019092	F	41	Present	Present	28	0	0								0													26	20	11	15	11	5	11	9	6	36	7	2	62
319	2012	583+9	284+9	2012-06-28	21	22	47	0.241	0.038908	F	41	Present	Present	28	0	1	42	92	1.41	-0.13274	20	45	1.169	1	1	52	119	2.746	0.0361947	30	72	2.505			0		26	20	11	15	11	5	11	9	6	36	7	2	62
320	2012	584+9	284+9	2012-06-28	21	23	52	0.222	0.00262066	M	41	Present	Present	28	0	0								0													26	20	11	15	11	5	11	9	6	36	7	2	62
321	2012	585+9	284+9	2012-06-28	21	21	48	0.208	0.0231954	M	41	Present	Present	28	0	0								0													26	20	11	15	11	5	11	9	6	36	7	2	62
322	2012	602+9	0+62	2012-07-03	26	24	49	0.218	-0.0186667	F	41	Present	Present	28	0	0								0													26	20	11	15	11	5	11	9	6	36	7	2	62
323	2012	603+9	0+62	2012-07-03	26	24	49	0.239	0.00233329	F	41	Present	Present	28	0	0								0													26	20	11	15	11	5	11	9	6	36	7	2	62
324	2012	604+9	0+62	2012-07-03	26	22	48	0.224	0.021908	F	41	Present	Present	28	0	1	40	59	1.05	-0.314423	18	11	0.826	0	0												26	20	11	15	11	5	11	9	6	36	7	2	62
307	2012	466+9	470	2012-06-17	10	23	47	0.188	-0.0313793	F	41	Present	Present	28	0	0								0													26	20	11	15	11	5	11	9	6	36	7	2	62
308	2012	467+9	470	2012-06-17	10	22	47	0.199	-0.00309198	M	41	Present	Present	28	0	0								0													26	20	11	15	11	5	11	9	6	36	7	2	62
309	2012	468+9	470	2012-06-17	10	22	48	0.201	-0.00109198	F	41	Present	Present	28	0	0								0													26	20	11	15	11	5	11	9	6	36	7	2	62
310	2012	494+9	PAD	2012-06-19	12	21	43	0.196	0.0111954	M	41	Present	Present	28	0	0								0													26	20	11	15	11	5	11	9	6	36	7	2	62
311	2012	495+9	PAD	2012-06-19	12	22	43	0.206	0.00390802	F	41	Present	Present	28	0	0								0													26	20	11	15	11	5	11	9	6	36	7	2	62
312	2012	496+9	PAD	2012-06-19	12	22	44	0.208	0.00590802	M	41	Present	Present	28	0	0								0													26	20	11	15	11	5	11	9	6	36	7	2	62
313	2012	497+9	PAD	2012-06-19	12	21	40	0.208	0.0231954	M	41	Present	Present	28	0	0								0													26	20	11	15	11	5	11	9	6	36	7	2	62
314	2012	498+9	96	2012-06-17	10	23	49	0.254	0.0346207	F	41	Present	Present	28	0	0								0													26	20	11	15	11	5	11	9	6	36	7	2	62
315	2012	543+9	AF_105	2012-06-23	16	22	46	0.178	-0.024092	M	41	Present	Present	28	0	0								0													26	20	11	15	11	5	11	9	6	36	7	2	62
316	2012	544+9	AF_105	2012-06-23	16	22	47	0.19	-0.012092	M	41	Present	Present	28	0	0								0													26	20	11	15	11	5	11	9	6	36	7	2	62
359	2013	827+9	554+9	09-juil	24	20	33	0.135	-0.0325172	F	41	Present	Present	28	0	0								0													26	22	19	15	13	11	11	9	8	36	34	17	62
26	2013	0+667	3212+9	19-juin	4	18	36	0.13	-0.00294251	M	41	Present	Present	28	0	1	35	79	1.09	0.17137	17	43	0.96	0	0												26	22	19	15	13	11	11	9	8	36	34	17	62
213	2013	644+9	3263+9	18-juin	3	22	46	0.24	0.037908	M	41	Present	Present	28	0	0								0													26	22	19	15	13	11	11	9	8	36	34	17	62
85	2013	0+733	AF_52	26-juin	11	22	47	0.186	-0.016092	F	41	Present	Present	28	0	1	37	78	1.05	-0.0469472	15	31	0.864	1	1	52	114	2.34	-0.369805	30	67	2.154			0		26	22	19	15	13	11	11	9	8	36	34	17	62
86	2013	0+734	AF_52	26-juin	11	22	46	0.187	-0.015092	F	41	Present	Present	28	0	1	37	80	1.1	0.00305284	15	34	0.913														26	22	19	15	13	11	11	9	8	36	34	17	62
83	2013	0+731	AF_52	26-juin	11	21	46	0.188	0.00319539	F	41	Present	Present	28	0	1	40	87	1.4	0.0355774	19	41	1.212	1	1	52	106	2.61	-0.0998053	31	60	2.422	2014-07-23	203	1	0	26	22	19	15	13	11	11	9	8	36	34	17	62
17	2013	0+657	279	18-juin	3	22	46	0.215	0.012908	F	41	Present	Present	28	0	1	40	92	1.44	0.0755774	18	46	1.225	0	0												26	22	19	15	13	11	11	9	8	36	34	17	62
358	2013	826+9	554+9	09-juil	24	22	44	0.15	-0.052092	F	41	Present	Present	28	0	1	34	73	0.84	0.0105283	12	29	0.69	1	1	46	95	1.65	-0.318762	24	51	1.5			0		26	22	19	15	13	11	11	9	8	36	34	17	62
287	2013	737+9	322	27-juin	12	21	48	0.221	0.0361954	M	41	Present	Present	28	0	1	43	102	1.64	0.00810192	22	54	1.419	1	1	49	117	2.48	0.140716	28	69	2.259					26	22	19	15	13	11	11	9	8	36	34	17	62
12	2013	0+652	279	18-juin	3	24	49	0.248	0.0113333	M	41	Present	Present	28	0	1	44	108	2.28	0.558943	20	59	2.032	0	0												26	22	19	15	13	11	11	9	8	36	34	17	62
11	2013	0+651	279	18-juin	3	24	48	0.23	-0.00666671	F	41	Present	Present	28	0	1	42	92	1.52	-0.0227396	18	44	1.29	1	1	50	95	2.37	-0.0927908	26	47	2.14	2014-06-29	179	1	0	26	22	19	15	13	11	11	9	8	36	34	17	62
212	2013	643+9	3263+9	18-juin	3	21	42	0.169	-0.0158046	F	41	Present	Present	28	0	1	39	83	1.26	-0.0152641	18	41	1.091	1	1	48	95	2.14	-0.0757764	27	53	1.971			0		26	22	19	15	13	11	11	9	8	36	34	17	62
294	2013	746+9	11	27-juin	12	21	44	0.201	0.0161954	F	41	Present	Present	28	0	1	40	87	1.28	-0.0844226	19	43	1.079	0	0												26	22	19	15	13	11	11	9	8	36	34	17	62
374	2013	846+9	0+586	21-juil	36	22	40	0.185	-0.017092	F	41	Present	Present	28	0	1	25	45	0.38	0.352955	3	5	0.195	0	0												26	22	19	15	13	11	11	9	8	36	34	17	62
325	2013	785+9	80B	04-juil	19	20	42	0.168	0.000482757	M	41	Present	Present	28	0	1	31	65	0.67	0.108004	11	23	0.502	0	0												26	22	19	15	13	11	11	9	8	36	34	17	62
178	2013	0+837	0+535	20-juil	35	23	46	0.196	-0.0233793	M	41	Present	Present	28	0	1	31	69	0.73	0.168004	8	23	0.534	0	0												26	22	19	15	13	11	11	9	8	36	34	17	62
14	2013	0+654	279	18-juin	3	23	48	0.207	-0.0123793	M	41	Present	Present	28	0	1	38	83	1.22	0.0338944	15	35	1.013	1	1	47	103	2.17	0.0777309	24	55	1.963					26	22	19	15	13	11	11	9	8	36	34	17	62
292	2013	744+9	322	27-juin	12	22	48	0.214	0.011908	F	41	Present	Present	28	0	1	43	95	1.55	-0.0818981	21	47	1.336	0	0												26	22	19	15	13	11	11	9	8	36	34	17	62
350	2013	816+9	174	07-juil	22	21	44	0.16	-0.0248046	M	41	Present	Present	28	0	1	32	79	0.72	0.0688453	11	35	0.56	0	0												26	22	19	15	13	11	11	9	8	36	34	17	62
61	2013	0+706	3320+9	23-juin	8	21	44	0.212	0.0271954	F	41	Present	Present	28	0	1	33	69	0.87	0.129687	12	25	0.658	1	1	45	91	1.8	-0.0452547	24	47	1.588			0		26	22	19	15	13	11	11	9	8	36	34	17	62
153	2013	0+808	138+9	06-juil	21	21	43	0.195	0.0101954	M	41	Present	Present	28	0	1	35	80	1	0.0813698	14	37	0.805	0	0												26	22	19	15	13	11	11	9	8	36	34	17	62
295	2013	747+9	11	27-juin	12	21	43	0.183	-0.00180461	F	41	Present	Present	28	0	1	36	78	1.08	0.0722113	15	35	0.897	1	1	49	99	2.06	-0.279284	28	56	1.877			0		26	22	19	15	13	11	11	9	8	36	34	17	62
181	2013	0+841	0+535	20-juil	35	22	46	0.2	-0.00209198	M	41	Present	Present	28	0	1	27	63	0.54	0.334638	5	17	0.34	1	1	35	80	1.16	0.549818	13	34	0.96					26	22	19	15	13	11	11	9	8	36	34	17	62
360	2013	828+9	554+9	09-juil	24	22	44	0.156	-0.046092	F	41	Present	Present	28	0	1	32	70	0.76	0.108845	10	26	0.604	1	1	45	95	1.61	-0.235255	23	51	1.454			0		26	22	19	15	13	11	11	9	8	36	34	17	62
25	2013	0+666	3212+9	19-juin	4	20	38	0.159	-0.00851724	F	41	Present	Present	28	0	1	35	70	0.94	0.0213698	15	32	0.781	1	1	42	88	1.55	0.075267	22	50	1.391			0		26	22	19	15	13	11	11	9	8	36	34	17	62
381	2013	855+9	414+9	25-juil	40	20	43	0.184	0.0164828	M	41	Present	Present	28	0	1	28	58	0.55	0.255479	8	15	0.366	1	1	39	83	1.41	0.305789	19	40	1.226					26	22	19	15	13	11	11	9	8	36	34	17	62
298	2013	752+9	11	27-juin	12	21	42	0.175	-0.00980461	M	41	Present	Present	28	0	1	36	76	1.03	0.0222113	15	34	0.855	0	0												26	22	19	15	13	11	11	9	8	36	34	17	62
347	2013	813+9	174	07-juil	22	21	45	0.179	-0.00580461	M	41	Present	Present	28	0	1	34	76	0.87	0.0405283	13	31	0.691	1	1	43	93	1.64	0.0417598	22	48	1.461					26	22	19	15	13	11	11	9	8	36	34	17	62
132	2013	0+785	3103+9	03-juil	18	21	42	0.163	-0.0218046	F	41	Present	Present	28	0	1	34	72	0.83	0.000528305	13	30	0.667	1	1	45	92	1.6	-0.245255	24	50	1.437			0		26	22	19	15	13	11	11	9	8	36	34	17	62
331	2012	0+426	AF_52	2012-06-14	7	22	45	0.192	-0.010092	M	42	Present	Present	28	0	0								0													27	21	17	15	13	10	12	8	7	40	22	11	67
337	2012	0+468	464	2012-06-17	10	23	47	0.222	0.00262066	M	42	Present	Present	28	0	0								0													27	21	17	15	13	10	12	8	7	40	22	11	67
338	2012	0+470	464	2012-06-17	10	23	48	0.21	-0.00937934	F	42	Present	Present	28	0	1	47	104	1.8	-0.188532	24	56	1.59	0	0												27	21	17	15	13	10	12	8	7	40	22	11	67
339	2012	0+471	464	2012-06-17	10	22	46	0.21	0.00790802	M	42	Present	Present	28	0	0								0													27	21	17	15	13	10	12	8	7	40	22	11	67
332	2012	0+427	AF_52	2012-06-14	7	20	39	0.137	-0.0305172	F	42	Present	Present	28	0	1	44	82	1.57	-0.151057	24	43	1.433	1	1	60	104	3.472	-0.225863	40	65	3.335	2013-07-22	202	1	7	27	21	17	15	13	10	12	8	7	40	22	11	67
157	2012	552+9	287	2012-06-24	17	22	48	0.172	-0.030092	F	42	Present	Present	28	0	1	44	94	1.53	-0.191057				0	0												27	21	17	15	13	10	12	8	7	40	22	11	67
329	2012	0+423	116	2012-06-12	5	23	48	0.225	0.00562066	M	42	Present	Present	28	0	0								0													27	21	17	15	13	10	12	8	7	40	22	11	67
202	2012	553+9	287	2012-06-24	17	22	46	0.174	-0.028092	M	42	Present	Present	28	0	1	42	92	1.42	-0.12274				1	1	51	108	2.272	-0.314298	29	62	2.098					27	21	17	15	13	10	12	8	7	40	22	11	67
334	2012	0+430	AF_52	2012-06-14	7	20	43	0.165	-0.00251724	M	42	Present	Present	28	0	0								0													27	21	17	15	13	10	12	8	7	40	22	11	67
335	2012	0+431	AF_52	2012-06-14	7	20	40	0.123	-0.0445172	M	42	Present	Present	28	0	0								0													27	21	17	15	13	10	12	8	7	40	22	11	67
336	2012	0+467	464	2012-06-17	10	23	47	0.218	-0.00137934	M	42	Present	Present	28	0	0								0													27	21	17	15	13	10	12	8	7	40	22	11	67
350	2012	0+498	11	2012-06-20	13	22	47	0.206	0.00390802	M	42	Present	Present	28	0	1								1	1	52	110	2.229	-0.480805	30	63	2.023					27	21	17	15	13	10	12	8	7	40	22	11	67
351	2012	0+543	424	2012-06-26	19	22	45	0.165	-0.037092	F	42	Present	Present	28	0	1	44	94	1.32	-0.401057	22	49	1.155	0	0												27	21	17	15	13	10	12	8	7	40	22	11	67
352	2012	0+544	424	2012-06-26	19	21	44	0.17	-0.0148046	F	42	Present	Present	28	0	0								0													27	21	17	15	13	10	12	8	7	40	22	11	67
340	2012	0+472	464	2012-06-17	10	22	46	0.218	0.015908	M	42	Present	Present	28	0	1	44	104	1.86	0.138943	22	58	1.642	1	1	53	124	3.219	0.385687	31	78	3.001					27	21	17	15	13	10	12	8	7	40	22	11	67
341	2012	0+473	464	2012-06-17	10	22	46	0.225	0.022908	M	42	Present	Present	28	0	1	48	109	2.14	0.0623095	26	63	1.915	1	1	54	128	3.32	0.36318	32	82	3.095					27	21	17	15	13	10	12	8	7	40	22	11	67
342	2012	0+474	464	2012-06-17	10	22	37	0.209	0.00690802	M	42	Present	Present	28	0	0								0													27	21	17	15	13	10	12	8	7	40	22	11	67
343	2012	0+475	464	2012-06-17	10	23	47	0.21	-0.00937934	F	42	Present	Present	28	0	1	44	95	1.38	-0.341057	21	48	1.17	1	1	53	111	2.437	-0.396313	30	64	2.227			0		27	21	17	15	13	10	12	8	7	40	22	11	67
344	2012	0+492	11	2012-06-20	13	22	42	0.21	0.00790802	M	42	Present	Present	28	0	1	41	90	1.25	-0.203581	19	48	1.04	1	1	50	115	2.203	-0.259791	28	73	1.993					27	21	17	15	13	10	12	8	7	40	22	11	67
345	2012	0+493	11	2012-06-20	13	21	47	0.214	0.0291954	M	42	Present	Present	28	0	0								0													27	21	17	15	13	10	12	8	7	40	22	11	67
346	2012	0+494	11	2012-06-20	13	23	49	0.229	0.00962066	F	42	Present	Present	28	0	1	48	107	1.72	-0.357691	25	58	1.491	0	0												27	21	17	15	13	10	12	8	7	40	22	11	67
363	2012	578+9	0+92	2012-06-28	21	20	43	0.197	0.0294828	M	42	Present	Present	28	0	1	39	89	1.27	-0.00526413	19	46	1.073	1	1	48	114	2.225	0.00922364	28	71	2.028					27	21	17	15	13	10	12	8	7	40	22	11	67
364	2012	581+9	0+92	2012-06-28	21	23	47	0.243	0.0236207	M	42	Present	Present	28	0	1	40	87	1.12	-0.244423	17	40	0.877	1	1	54	114	2.484	-0.47282	31	67	2.241					27	21	17	15	13	10	12	8	7	40	22	11	67
365	2012	582+9	0+92	2012-06-28	21	23	47	0.225	0.00562066	F	42	Present	Present	28	0	0								0													27	21	17	15	13	10	12	8	7	40	22	11	67
326	2012	0+420	116	2012-06-12	5	23	45	0.22	0.000620658	F	42	Present	Present	28	0	1	45	92	1.41	-0.400215	22	47	1.19	1	1	53	107	2.262	-0.571313	30	62	2.042			0		27	21	17	15	13	10	12	8	7	40	22	11	67
353	2012	0+545	424	2012-06-26	19	21	46	0.165	-0.0198046	F	42	Present	Present	28	0	1	40	58	0.95	-0.414423	19	12	0.785	0	0												27	21	17	15	13	10	12	8	7	40	22	11	67
354	2012	0+546	424	2012-06-26	19	21	44	0.168	-0.0168046	F	42	Present	Present	28	0	0								0													27	21	17	15	13	10	12	8	7	40	22	11	67
355	2012	0+547	424	2012-06-26	19	20	43	0.158	-0.00951724	M	42	Present	Present	28	0	0								0													27	21	17	15	13	10	12	8	7	40	22	11	67
356	2012	0+548	424	2012-06-26	19	22	46	0.184	-0.018092	F	42	Present	Present	28	0	0								0													27	21	17	15	13	10	12	8	7	40	22	11	67
357	2012	0+550	424	2012-06-26	19	21	45	0.172	-0.0128046	F	42	Present	Present	28	0	1	40	73	1.24	-0.124423	19	28	1.068	0	0												27	21	17	15	13	10	12	8	7	40	22	11	67
358	2012	0+551	424	2012-06-26	19	21	44	0.168	-0.0168046	F	42	Present	Present	28	0	1	42	88	1.26	-0.28274	21	44	1.092	0	0												27	21	17	15	13	10	12	8	7	40	22	11	67
359	2012	0+610	322	2012-07-05	28	14	30	0.076	0.012207	M	42	Present	Present	28	0	0								0													27	21	17	15	13	10	12	8	7	40	22	11	67
360	2012	0+611	322	2012-07-05	28	19	40	0.131	-0.0192299	M	42	Present	Present	28	0	0								0													27	21	17	15	13	10	12	8	7	40	22	11	67
348	2012	0+496	11	2012-06-20	13	24	52	0.223	-0.0136667	F	42	Present	Present	28	0	1	49	110	1.93	-0.236849	25	58	1.707	0	0												27	21	17	15	13	10	12	8	7	40	22	11	67
349	2012	0+497	11	2012-06-20	13	23	47	0.214	-0.00537934	F	42	Present	Present	28	0	1								0													27	21	17	15	13	10	12	8	7	40	22	11	67
268	2013	714+9	3233+9	25-juin	10	21	45	0.194	0.00919539	M	45	Present	Present	28	0	1	37	86	1.2	0.103053	16	41	1.006	1	1	48	109	2.34	0.124224	27	64	2.146					27	22	11	16	13	4	11	9	7	32	17	3	59
210	2013	641+9	3312+9	18-juin	3	20	40	0.145	-0.0225172	M	45	Present	Present	28	0	1	44	97	1.49	-0.231057	24	57	1.345	0	0												27	22	11	16	13	4	11	9	7	32	17	3	59
161	2013	0+817	PAD+PAG+PPG+1900+400	08-juil	23	21	46	0.205	0.0201954	M	45	Present	Present	28	0	0								0													27	22	11	16	13	4	11	9	7	32	17	3	59
9	2013	0+648	3241+9	18-juin	3	22	46	0.204	0.00190802	F	45	Present	Present	28	0	1	36	76	0.93	-0.0777887	14	30	0.726	0	0												27	22	11	16	13	4	11	9	7	32	17	3	59
118	2013	0+770	464	29-juin	14	21	43	0.181	-0.00380461	F	45	Present	Present	28	0	0								0													27	22	11	16	13	4	11	9	7	32	17	3	59
271	2013	717+9	3233+9	25-juin	10	21	43	0.208	0.0231954	M	45	Present	Present	28	0	1	35	76	0.91	-0.00863018	14	33	0.702	0	0												27	22	11	16	13	4	11	9	7	32	17	3	59
318	2013	776+9	6	02-juil	17	21	46	0.203	0.0181954	M	45	Present	Present	28	0	1	36	82	0.99	-0.0177887	15	36	0.787	1	1	46	105	2.04	0.0712381	25	59	1.837					27	22	11	16	13	4	11	9	7	32	17	3	59
252	2013	694+9	90	22-juin	7	22	37	0.214	0.011908	F	45	Present	Present	28	0	0								0													27	22	11	16	13	4	11	9	7	32	17	3	59
320	2013	778+9	6	02-juil	17	24	48	0.207	-0.0296667	F	45	Present	Present	28	0	0								0													27	22	11	16	13	4	11	9	7	32	17	3	59
50	2013	0+694	0+92	22-juin	7	24	49	0.22	-0.0166667	M	45	Present	Present	28	0	0								0													27	22	11	16	13	4	11	9	7	32	17	3	59
255	2013	697+9B	90	22-juin	7	23	45	0.225	0.00562066	F	45	Present	Present	28	0	1	43	86	1.5	-0.131898	20	41	1.275	0	0												27	22	11	16	13	4	11	9	7	32	17	3	59
168	2013	0+826	0+561	10-juil	25	21	44	0.195	0.0101954	M	45	Present	Present	28	0	1	32	74	0.784	0.132845	11	30	0.589	0	0												27	22	11	16	13	4	11	9	7	32	17	3	59
333	2013	795+9	0+62	04-juil	19	21	44	0.201	0.0161954	M	45	Present	Present	28	0	0								0													27	22	11	16	13	4	11	9	7	32	17	3	59
182	2013	0+842	0+427	22-juil	37	21	45	0.198	0.0131954	M	45	Present	Present	28	0	1	31	60	0.7	0.138004	10	15	0.502	0	0												27	22	11	16	13	4	11	9	7	32	17	3	59
209	2013	638+9	3312+9	18-juin	3	19	35	0.11	-0.0402299	F	45	Present	Present	28	0	0								0													27	22	11	16	13	4	11	9	7	32	17	3	59
126	2013	0+778	464	29-juin	14	21	46	0.186	0.00119539	F	45	Present	Present	28	0	0								0													27	22	11	16	13	4	11	9	7	32	17	3	59
330	2013	792+9	0+62	04-juil	19	22	44	0.191	-0.011092	F	45	Present	Present	28	0	0								0													27	22	11	16	13	4	11	9	7	32	17	3	59
55	2013	0+700	3303+9	22-juin	7	22	45	0.189	-0.013092	M	45	Present	Present	28	0	0								0													27	22	11	16	13	4	11	9	7	32	17	3	59
160	2013	0+816	PAD+PAG+PPG+1900+400	08-juil	23	21	46	0.203	0.0181954	M	45	Present	Present	28	0	1	33	76	0.84	0.0996868	12	30	0.637	0	0												27	22	11	16	13	4	11	9	7	32	17	3	59
286	2013	736+9	3294+9	27-juin	12	23	49	0.236	0.0166207	F	45	Present	Present	28	0	1	36	78	1.01	0.00221133	13	29	0.774	0	0												27	22	11	16	13	4	11	9	7	32	17	3	59
119	2013	0+771	464	29-juin	14	22	45	0.197	-0.00509198	M	45	Present	Present	28	0	0								0													27	22	11	16	13	4	11	9	7	32	17	3	59
273	2013	721+9	3233+9	25-juin	10	21	43	0.197	0.0121954	F	45	Present	Present	28	0	1	39	84	1.25	-0.0252641	18	41	1.053	0	0												27	22	11	16	13	4	11	9	7	32	17	3	59
57	2013	0+702	3303+9	22-juin	7	22	41	0.183	-0.019092	F	45	Present	Present	28	0	1	44	97	1.64	-0.0810566	22	56	1.457	0	0												27	22	11	16	13	4	11	9	7	32	17	3	59
60	2013	0+705	3303+9	22-juin	7	22	47	0.216	0.013908	M	45	Present	Present	28	0	1	40	90	1.48	0.115577	18	43	1.264	0	0												27	22	11	16	13	4	11	9	7	32	17	3	59
49	2013	0+693	0+92	22-juin	7	22	48	0.239	0.036908	F	45	Present	Present	28	0	0								0													27	22	11	16	13	4	11	9	7	32	17	3	59
184	2013	0+844	0+427	22-juil	37	23	47	0.208	-0.0113793	F	45	Present	Present	28	0	0								0													27	22	11	16	13	4	11	9	7	32	17	3	59
145	2013	0+800	0+315	04-juil	19	22	46	0.213	0.010908	F	45	Present	Present	28	0	0								0													27	22	11	16	13	4	11	9	7	32	17	3	59
270	2013	716+9	3233+9	25-juin	10	21	43	0.218	0.0331954	M	45	Present	Present	28	0	1	42	100	1.657	0.11426	21	57	1.439	0	0												27	22	11	16	13	4	11	9	7	32	17	3	59
206	2013	635+9	3312+9	18-juin	3	19	44	0.145	-0.00522988	M	45	Present	Present	28	0	0								0													27	22	11	16	13	4	11	9	7	32	17	3	59
137	2013	0+791	517+9	04-juil	19	21	44	0.209	0.0241954	F	46	Warm	Warm	38	0	1	43	98	1.6	-0.0318981	22	54	1.391	0	0												28	18	5	17	12	4	11	6	1	34	25	3	62
285	2013	735+9	3294+9	27-juin	12	23	46	0.234	0.0146207	F	46	Warm	Warm	38	0	1	44	92	1.65	-0.0710566	21	46	1.416	0	0												28	18	5	17	12	4	11	6	1	34	25	3	62
159	2013	0+815	PAD+PAG+PPG+1900+400	08-juil	23	21	47	0.234	0.0491954	M	46	Warm	Warm	38	0	1	37	90	1.25	0.153053	16	43	1.016	0	0												28	18	5	17	12	4	11	6	1	34	25	3	62
81	2013	0+728	AF_52	26-juin	11	22	46	0.189	-0.013092	M	46	Warm	Warm	38	0	0								0													28	18	5	17	12	4	11	6	1	34	25	3	62
183	2013	0+843	0+427	22-juil	37	22	45	0.215	0.012908	F	46	Warm	Warm	38	0	1	34	77	1.02	0.190528	12	32	0.805	0	0												28	18	5	17	12	4	11	6	1	34	25	3	62
185	2013	0+845	0+427	22-juil	37	21	46	0.201	0.0161954	M	46	Warm	Warm	38	0	1	31	76	0.93	0.368004	10	30	0.729	0	0												28	18	5	17	12	4	11	6	1	34	25	3	62
144	2013	0+798	0+315	04-juil	19	21	46	0.212	0.0271954	M	46	Warm	Warm	38	0	1	40	95	1.44	0.0755774	19	49	1.228														28	18	5	17	12	4	11	6	1	34	25	3	62
16	2013	0+656	279	18-juin	3	23	47	0.21	-0.00937934	F	46	Warm	Warm	38	0	1	47	79	1.99	0.00146797	24	32	1.78	0	0												28	18	5	17	12	4	11	6	1	34	25	3	62
383	2013	857+9	0+570	31-juil	46	20	45	0.194	0.0264828	M	46	Warm	Warm	38	0	1	27	59	0.5	0.294638	7	14	0.306	0	0												28	18	5	17	12	4	11	6	1	34	25	3	62
124	2013	0+776	464	29-juin	14	21	43	0.179	-0.00580461	F	46	Warm	Warm	38	0	1	44	98	1.68	-0.0410566	23	55	1.501	1	1	56	109	3.19	-0.0138342	35	66	3.011			0		28	18	5	17	12	4	11	6	1	34	25	3	62
344	2013	808+9	424	05-juil	20	21	43	0.184	-0.000804609	F	46	Warm	Warm	38	0	1	38	85	1.2	0.0138944	17	42	1.016	0	0												28	18	5	17	12	4	11	6	1	34	25	3	62
120	2013	0+772	464	29-juin	14	21	44	0.17	-0.0148046	M	46	Warm	Warm	38	0	0								0													28	18	5	17	12	4	11	6	1	34	25	3	62
122	2013	0+774	464	29-juin	14	20	42	0.172	0.00448276	M	46	Warm	Warm	38	0	1	45	100	1.79	-0.0202151	25	58	1.618	1	1	56	115	3.48	0.276166	36	73	3.308					28	18	5	17	12	4	11	6	1	34	25	3	62
121	2013	0+773	464	29-juin	14	21	45	0.179	-0.00580461	M	46	Warm	Warm	38	0	0								0													28	18	5	17	12	4	11	6	1	34	25	3	62
84	2013	0+732	AF_52	26-juin	11	22	46	0.179	-0.023092	M	46	Warm	Warm	38	0	1	47	104	1.98	-0.00853203	25	58	1.801	0	0												28	18	5	17	12	4	11	6	1	34	25	3	62
193	2013	618+9	3346+9	15-juin	0	18	34	0.116	-0.0169425	F	46	Warm	Warm	38	0	0								0													28	18	5	17	12	4	11	6	1	34	25	3	62
15	2013	0+655	279	18-juin	3	22	46	0.221	0.018908	F	46	Warm	Warm	38	0	1	47	103	1.92	-0.068532	25	57	1.699	0	0												28	18	5	17	12	4	11	6	1	34	25	3	62
346	2013	812+9	424	05-juil	20	21	44	0.196	0.0111954	M	46	Warm	Warm	38	0	0								0													28	18	5	17	12	4	11	6	1	34	25	3	62
386	2013	862+9	0+570	31-juil	46	21	45	0.188	0.00319539	F	46	Warm	Warm	38	0	1	30	48	0.62	0.147162	9	3	0.432	0	0												28	18	5	17	12	4	11	6	1	34	25	3	62
13	2013	0+653	279	18-juin	3	24	49	0.245	0.00833329	M	46	Warm	Warm	38	0	0								0													28	18	5	17	12	4	11	6	1	34	25	3	62
79	2013	0+726	AF_52	26-juin	11	22	48	0.182	-0.020092	F	46	Warm	Warm	38	0	1	49	108	2.24	0.073151	27	60	2.058	0	0												28	18	5	17	12	4	11	6	1	34	25	3	62
80	2013	0+727	AF_52	26-juin	11	22	47	0.182	-0.020092	F	46	Warm	Warm	38	0	1	44	98	1.86	0.138943	22	51	1.678	0	0												28	18	5	17	12	4	11	6	1	34	25	3	62
194	2013	621+9	3346+9	15-juin	0	18	34	0.118	-0.0149425	M	46	Warm	Warm	38	0	0								0													28	18	5	17	12	4	11	6	1	34	25	3	62
135	2013	0+788	517+9	04-juil	19	23	48	0.198	-0.0213793	F	46	Warm	Warm	38	0	1	45	97	1.47	-0.340215	22	49	1.272	0	0												28	18	5	17	12	4	11	6	1	34	25	3	62
283	2013	733+9	3294+9	27-juin	12	24	50	0.257	0.0203333	F	46	Warm	Warm	38	0	1	49	104	1.84	-0.326849	25	54	1.583	0	0												28	18	5	17	12	4	11	6	1	34	25	3	62
136	2013	0+790	517+9	04-juil	19	22	47	0.191	-0.011092	F	46	Warm	Warm	38	0	0								0													28	18	5	17	12	4	11	6	1	34	25	3	62
123	2013	0+775	464	29-juin	14	21	44	0.194	0.00919539	M	46	Warm	Warm	38	0	1	39	85	1.31	0.0347359	18	41	1.116	0	0												28	18	5	17	12	4	11	6	1	34	25	3	62
313	2013	771+9	118	30-juin	15	21	45	0.22	0.0351954	M	46	Warm	Warm	38	0	1	40	90	1.49	0.125577	19	45	1.27	0	0												28	18	5	17	12	4	11	6	1	34	25	3	62
316	2013	774+9	118	30-juin	15	21	44	0.21	0.0251954	M	46	Warm	Warm	38	0	1	42	92	1.56	0.0172604	21	48	1.35	0	0												28	18	5	17	12	4	11	6	1	34	25	3	62
[truncated: 21 more columns]
